## 1 Cellular determinants of metabolite concentration ranges

2 Jeanne M. O. Eloundou-Mbebi<sup>1,2†</sup>, Anika Küken<sup>1,2†</sup>, Georg Basler<sup>1</sup>, Zoran Nikoloski<sup>1,2\*</sup>

3 <sup>1</sup>*System Biology and Mathematical Modeling Group, Max Planck Institute of Molecular*

4 *Plant Physiology, Am Mühlenberg 1, Potsdam-Golm, Germany*

5 <sup>2</sup>*Bioinformatics Group, Institute of Biochemistry and Biology, University of Potsdam, Karl-*

6 *Liebkecht-Str. 24-25, Potsdam-Golm, Germany*

7

8 †these authors contributed equally

9 \*Correspondence to: [nikoloski@mpimp-golm.mpg.de](mailto:nikoloski@mpimp-golm.mpg.de).

10

11 **Abstract:** Cellular functions are shaped by reaction networks whose dynamics are determined  
12 by the concentrations of underlying components. However, cellular mechanisms ensuring that  
13 a component's concentration resides in a given range remain elusive. We present network  
14 properties which suffice to identify components whose concentration ranges can be efficiently  
15 computed in mass-action metabolic networks. We show that the derived ranges are in excellent  
16 agreement with simulations from a detailed kinetic metabolic model of *Escherichia coli*. We  
17 demonstrate that the approach can be used with genome-scale metabolic models to arrive at  
18 predictions concordant with measurements from *Escherichia coli* under different growth  
19 scenarios. By application to 14 genome-scale metabolic models from diverse species, our  
20 approach specifies the cellular determinants of concentration ranges that can be effectively  
21 employed to make predictions for a variety of biotechnological and medical applications.

22

23

24

25

26 **Author Summary**

27 We present a computational approach for inferring concentration ranges from genome-scale  
28 metabolic models. The approach specifies a determinant and molecular mechanism underling  
29 facile control of concentration ranges for components in large-scale cellular networks. Most  
30 importantly, the predictions about concentration ranges do not require knowledge of kinetic  
31 parameters (which are difficult to specify at a genome scale), provided measurements of  
32 concentrations in a reference state. The approach assumes that reaction rates follow the mass  
33 action law used in the derivations of other types of kinetics. We apply the approach with large-  
34 scale kinetic and stoichiometric metabolic models of organisms from different kingdoms of life  
35 to show that we can identify a proportion of metabolites to which our approach is applicable.  
36 By challenging the predictions of concentration ranges in the genome-scale metabolic network  
37 of *E. coli* with real-world data sets, we further demonstrate the prediction power and limitations  
38 of the approach.

39

## 40 **Introduction**

41 Advances in systems biology studies have been propelled by the availability of high-quality  
42 genome-scale metabolic reconstructions for many organisms across all kingdoms of life [1].  
43 Metabolic network reconstructions contain information about metabolites and reactions  
44 through which they are transformed to support different cellular processes [2, 3]. Alongside  
45 enzyme concentrations and phenomenological constants, reaction rates and metabolite  
46 concentrations—as two faces of the metabolic phenotype—characterize key aspects of the  
47 metabolic capabilities of an organism. Since metabolic concentrations are important  
48 determinants of reaction rates [4], understanding what controls their physiological ranges can  
49 point to cellular mechanisms that control phenotypic plasticity to ensure viability of organisms  
50 under changing conditions [5].

51 A naïve approach to determine a concentration range for a given component is to  
52 assume that it is present with a single molecule or that the entire cell dry weight under an  
53 investigated scenario is composed solely of that component. This derivation requires only  
54 knowledge of the component’s molecular weight, which is readily available. However, the  
55 derived ranges are vast and largely invariant under different scenarios; therefore, they are not  
56 informative. Here we ask whether large-scale metabolic models can be used for accurate  
57 prediction of concentration ranges. Resolving this question is tantamount to identifying a  
58 cellular mechanism underlying the control of concentration range for given cellular component.

59 The change in concentration of metabolites can be described by a system of coupled  
60 ordinary differential equations (ODEs),  $\frac{dx(t)}{dt} = Nv(t)$ , where  $v(t) = (v_1(t), \dots, v_n(t))^T$   
61 denotes reaction rates and  $x(t) = (x_1(t), \dots, x_m(t))$  the metabolite concentrations at time  $t$ ,  
62 and  $N$  represents the stoichiometric matrix. The rows of the stoichiometric matrix correspond  
63 to metabolites, columns stand for reactions, and its entries denote the stoichiometric  
64 coefficients with which metabolites participate in reactions as substrates or products [6].

65 Reaction rates are modeled according to a kinetic law,  $v(t) = f(x(t), \theta)$ , which often leads to  
66 nonlinearities and involves multiple parameters, denoted by  $\theta$  [7]. As a result, the coupled  
67 nonlinear ODEs are often not analytically tractable and their simulations are challenging. These  
68 issues arise since parameters remain poorly specified at a genome scale for the majority of  
69 model organisms [8, 9] and the nonlinear ODEs may lead to numerical issues [10]. In addition,  
70 determining the steady-state concentration ranges by characterizing the solutions to the system  
71 of non-linear equations  $Nf(x(t), \theta) = 0$  is intractable for large-scale networks even when the  
72 equations have a simplified mass action form often used in metabolic modeling [11].

73 Feasible steady-state reaction rates,  $v$ , for which  $Nv = 0$ , can be predicted based solely  
74 on the structure of the network with computational approaches from the constraint-based  
75 modeling framework [12]. However, since intracellular reaction rates cannot be measured  
76 directly, the validation of these predictions requires laborious labeling experiments and model  
77 fitting procedures [13]. By neglecting the effect of concentrations on reaction rates, constraint-  
78 based approaches do not facilitate the usage of metabolic network reconstructions to predict  
79 concentrations of metabolites, which are becoming more accessible by quantitative  
80 metabolomics technologies [14].

81 The existing constraint-based approaches that can make predictions of metabolite  
82 concentrations and their ranges are based on consideration of thermodynamics constraints.  
83 Thermodynamics-based metabolic flux analysis (TMFA) produces flux distributions that do  
84 not contain any thermodynamically infeasible reactions or pathways, and it provides  
85 information about the free energy change of reactions and the range of metabolite  
86 concentrations in addition to reaction fluxes [15]. However, due to uncertainty in the estimation  
87 of the standard Gibbs free energies, TMFA usually predicts unconstrained ranges for  
88 metabolite concentrations (see Discussion in Henry et al. [15]). Metabolic Tug-of-War  
89 (mTOW) extends TMFA but is based on a non-convex optimization approach which comes at

90 a cost of local optima and lack of robustness of predictions (validated by correlation [16]). A  
91 method to predict metabolite concentration ranges with limited knowledge about the  
92 underlying kinetic laws and parameter values would allow direct integration and validation of  
93 genome-scale models with experimental data from metabolomics technologies, enabling  
94 systems biology applications, from engineering of intervention strategies to design of new  
95 drugs [17-19].

96 Here we provide an approach which relies on the structure of the network, encoded in  
97 the stoichiometric matrix, to provide simulation-free prediction of steady-state concentration  
98 ranges by employing mass action kinetics. We focus on mass action kinetics since it underlies  
99 the derivation of more involved types of kinetics for different reaction mechanisms [20], allows  
100 for consideration of enzyme concentration if enzymes appear as reaction substrates, and  
101 provides a simple mathematical form that may be amenable to analytical treatment. The usage  
102 of mass action was here also favored due to lack of information about reaction mechanisms at  
103 a genome-scale level. The approach expands on the well-established concept of full coupling  
104 of reactions [21] to consider pairs of reactions whose ratio of mass-action-compatible fluxes  
105 depends only on the respective rate constants. Thus, this flux ratio is invariant at any, not  
106 necessarily steady, state of the system. The approach is also refined to predict concentration  
107 ranges for unseen cellular scenarios provided concentration data from a reference experiment.  
108 Our method complements the constraint-based modeling framework, focused on analysis of  
109 steady-state reaction rates, and thus enables a comprehensive characterization of feasible  
110 concentrations in genome-scale metabolic networks under specified conditions.

111

112 **Results**

113 **Metabolites with structurally constrained concentrations (SCC)**

114 Consider a metabolic network composed of  $m$  metabolites that participate in  $n$  reactions. The  
 115  $(m \times n)$  stoichiometric matrix,  $N$ , can be written as a difference of two non-negative matrices,  
 116  $N = N^+ - N^-$ , where  $N^+$  includes the stoichiometry of the products and  $N^-$  comprises the  
 117 stoichiometry of the substrates of each reaction. For instance, the stoichiometry of substrates  
 118 and products given in Fig. 1b describes the metabolic network on Fig. 1a. We assume that the  
 119 rate of reaction  $R_i$  is modeled according to mass action kinetic, whereby  $v_i = \theta_i \prod_j x_j^{N_{ji}^-}$ , where  
 120  $\theta_i > 0$  is the reaction constant and the concentration of each substrate molecule appears in  $v_i$   
 121 as a multiplicative factor.

122

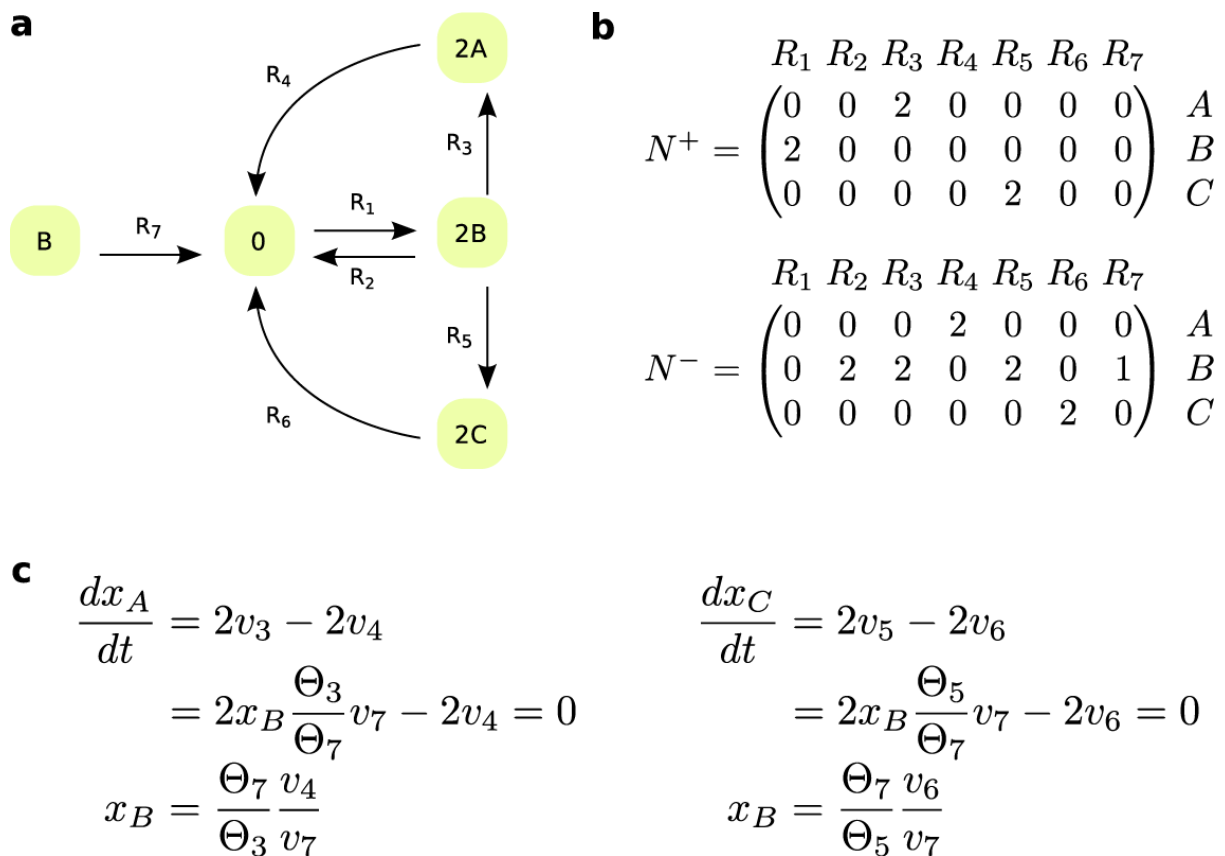

123

124 **Fig. 1. Network with a component exhibiting structurally constrained concentration. (a)**

125 Reaction diagram that includes seven reactions,  $R_1 - R_7$ , and three components,  $A - C$ . (b)

126 stoichiometric matrices associated with substrates,  $N^-$ , and products,  $N^+$ , for the network in  
127 (a). Reaction  $R_7$  lacks one substrate molecule of  $B$  in comparison to  $R_2$ , since  $N_{22}^- - N_{27}^- = 1$   
128 and  $N_{i2}^- - N_{i7}^- = 0$  for every  $i \neq 2$ . Reactions  $R_3$  and  $R_5$  share the same substrate components  
129 with same stoichiometry, and hence their fluxes are fully coupled under the assumption of mass  
130 action kinetic. Reaction  $R_3$  is fully coupled to reaction  $R_4$ , as are reactions  $R_5$  and  $R_6$ . (c)  
131 Component  $B$  exhibits structurally constrained concentration from the ODEs of components  $A$   
132 and  $C$ . The network exhibits different positive steady states with changing rate of reaction  $R_1$ .

133 To state our main result, we require some concepts and terminology which we next  
134 introduce and illustrate. We will say that a reaction  $R_k$  lacks one substrate molecule of  $X_i$  in  
135 comparison to reaction  $R_l$ , if  $N_{il}^- - N_{ik}^- = 1$  and for every  $i' \neq i$ ,  $N_{i'l}^- - N_{i'k}^- = 0$ . For the  
136 network in Fig. 1a, reaction  $R_7$  lacks one substrate molecule of component  $B$  in comparison to  
137 reaction  $R_2$ . Under the assumption of mass action kinetic, if a reaction lacks one substrate  
138 molecule in comparison to another, the reactions differ in their orders by one. As a result, the  
139 ratio of fluxes for such reactions at any state of the system depends only on the rate constants  
140 and the concentration of the substrate in which the reactions differ.

141 Furthermore, two reactions  $R_k$  and  $R_l$  are fully coupled if there exists  $\lambda > 0$ , such that  
142  $v_l = \lambda v_k$  for any positive steady-state reaction rate  $v$ , *i.e.*,  $Nv = 0$  [21]. Therefore, fully  
143 coupled reactions have an invariant ratio over all positive steady states that the network admits,  
144 and full coupling is a transitive relation. For the network in Fig. 1a, reaction  $R_3$  is fully coupled  
145 to  $R_4$  and  $R_5$  is fully coupled to  $R_6$ . Such reactions, which are fully coupled irrespective of the  
146 kinetic law, can be efficiently determined based on the stoichiometry of large-scale networks  
147 by linear programming [21, 22] (see Materials and Methods).

148 Under the assumption of mass action kinetic, two reactions that share the same  
149 substrates of same stoichiometry are also fully coupled [23]. In this case, the coupling holds  
150 for any, not necessarily steady, state of the system. Therefore, the consideration of mass action

151 kinetic expands the set of fully coupled reactions. For instance, this is the case for reactions  $R_3$   
 152 and  $R_5$  that have the substrate components of same stoichiometry in Fig. 1a, whereby  $\frac{v_3}{v_5} = \frac{\theta_3}{\theta_5}$ .

153 Consider now a metabolite  $X_j$  with an ODE given by  $\frac{dx_j}{dt} = \sum_{k \in P_j} N_{jk}^+ v_k - \sum_{l \in S_j} N_{jl}^- v_l$ ,  
 154 where  $P_j$  is the set of reactions with  $X_j$  as one of their products and  $S_j$  is the set of reactions  
 155 which have metabolite  $X_j$  as one of their substrates. A metabolite  $X_i$ , not necessarily different  
 156 from  $X_j$ , has structurally constrained concentration (SCC), if the following conditions hold: (i)  
 157 for each reaction  $R_l$  in  $S_j$ , there exists a non-empty subset  $Q_l^{-i}$  of reactions lacking one substrate  
 158 molecule of  $X_i$  in comparison to  $R_l$ ; the union of all  $Q_l^{-i}$  yields the set of reactions  $S_j^{-i}$ ; (ii) all  
 159 reactions in  $S_j^{-i}$  are mutually fully coupled; and (iii) all reactions in  $P_j$  are mutually fully  
 160 coupled. A similar argument can be made with respect to condition (i) in terms of reactions in  
 161 the set  $P_j$  (Materials and Methods). A metabolite  $X_i$  that satisfies the conditions above will be  
 162 referred to as a SCC metabolite.

163 In the following, we use the ODE for metabolite  $X_j$  to derive the concentration bounds  
 164 for a metabolite  $X_i$  with SCC. Let  $Q$  be a subset of  $S_j^{-i}$  that contains one and only one reaction  
 165 from each of  $Q_l^{-i}$ . Under mass action, for the flux of every reaction  $R_l \in S_j$ , it then holds that  
 166  $v_l = x_i \frac{\theta_l}{\theta_l^{-i}} v_l^{-i}$  (see Materials and Methods), where  $\theta_l^{-i}$  is the reaction constant and  $v_l^{-i}$  the  
 167 flux of a reaction  $R_l^{-i} \in Q$ . The expression for  $\frac{dx_j}{dt}$  above then becomes  $\sum_{k \in P_j} N_{jk}^+ v_k -$   
 168  $x_i \sum_{l \in S_j} N_{jl}^- \frac{\theta_l}{\theta_l^{-i}} v_l^{-i}$ .

169 At any positive steady state, it then holds that  $\frac{dx_j}{dt} = v_p \sum_{k \in P_j} N_{jk}^+ \frac{v_k}{v_p} -$   
 170  $x_i v_s^{-i} \sum_{l \in S_j} N_{jl}^- \frac{\theta_l}{\theta_l^{-i}} \frac{v_l^{-i}}{v_s^{-i}} = 0$ , for any flux  $v_p$  of reaction  $R_p \in P_j$  and flux  $v_s^{-i}$  of reaction  $R_s^{-i} \in$   
 171  $Q$ . Due to the conditions (iii), above, the sum  $\sigma_p = \sum_{k \in P_j} N_{jk}^+ \frac{v_k}{v_p}$  is a constant which, in the



172 simplest case, when all reactions in  $P_j$  are fully coupled irrespective of the kinetic rate law,  
 173 depends only on the network structure. In addition, due to condition (ii), above, the value of  
 174  $\sigma_s^{-i} = \sum_{l \in S_j} N_{jl}^- \frac{\theta_l v_l^{-i}}{\theta_l^{-i} v_s^{-i}}$  is also a constant which depends on both the network structure and a  
 175 subset of rate constants. The rate constants which appear in the expression for  $\sigma_s^{-i}$  and  $\sigma_p$  for  
 176 any  $Q \subseteq S_j^{-i}$  will be referred to as *relevant rate constants*, while the flux ratio  $\frac{v_p}{v_s^{-i}}$  will be called  
 177 *relevant flux ratio*.

178 Therefore, given a steady-state flux distribution,  $v$ , a set  $Q \subseteq S_j^{-i}$ , and two reactions  
 179  $R_p \in P_j$  and  $R_s^{-i} \in Q$ , we have that  $x_i = \frac{\sigma_p}{\sigma_s^{-i}} \frac{v_p}{v_s^{-i}}$ . This derivation establishes a direct relation  
 180 between a flux distribution, under specified inputs from the environment, and the concentration  
 181 of a SCC metabolite. We can also use the derived expression to obtain the concentration bounds  
 182 for  $x_i$  over any set,  $F$ , of steady-state flux distributions and subset  $Q$  (per definition above),  
 183 yielding the following:

$$184 \quad \min_{\{Q,F\}} \frac{\sigma_p}{\sigma_s^{-i}} \frac{v_p}{v_s^{-i}} \leq x_i \leq \max_{\{Q,F\}} \frac{\sigma_p}{\sigma_s^{-i}} \frac{v_p}{v_s^{-i}}. \quad (1)$$

185 For instance, component  $B$  in Fig. 1a is SCC, derived from the ODE of component  $A$ , whereby  
 186 the relevant flux ratio is  $\frac{v_4}{v_7}$  and the relevant rate constants are  $\theta_3$  and  $\theta_7$  (Fig. 1c). Similarly,  
 187 one can show that component  $B$  is SCC from the ODE of component  $C$ .

188 Let the lower and upper bounds for the concentration of metabolite  $X_i$  derived from the  
 189 ODE of metabolite  $X_j$  in Eq. (1) be denoted by  $L_i^j = \min_{\{Q,F\}} \frac{\sigma_p}{\sigma_s^{-i}} \frac{v_p}{v_s^{-i}}$  and  $U_i^j = \max_{\{Q,F\}} \frac{\sigma_p}{\sigma_s^{-i}} \frac{v_p}{v_s^{-i}}$ ,  
 190 respectively. If there are  $r$  metabolites  $X_d$ ,  $1 \leq d \leq r$  for which Eq. (1) applies, then the lower  
 191 and upper bounds for the concentration of  $X_i$  are given by the intersection of the ranges derived  
 192 from the ODEs of  $X_d$ , i.e.,

$$193 \quad \max_d L_i^d \leq x_i \leq \min_d U_i^d. \quad (2)$$

194 Therefore, the lower bound is the minimum of the maxima, while the upper bound is the  
195 maximum of the minima derived from the individual ODEs. In case that the SCC of a  
196 metabolite can be derived from multiple ODEs, Eq. (2) provides more constrained predictions  
197 about metabolite concentration ranges than Eq. (1) alone. For instance, component  $B$  in Fig. 1a  
198 is SCC not only from the ODE of component  $A$  but also from that of  $C$ , whereby the relevant  
199 flux ratio is  $\frac{v_6}{v_7}$  and the relevant rate constants are  $\theta_5$  and  $\theta_7$  (Fig. 1c). In case that the upper  
200 bound is smaller than the lower bound in Eq. (2) then the system of ODEs does not have a  
201 positive solution for  $X_i$ , which implies that the network does not allow a positive steady state.  
202 Therefore, the approach can also be used to check for existence of positive steady state with  
203 respect to a SCC metabolite under mass action kinetics.

204

### 205 **Validation of the approach with a large-scale kinetic model of *E. coli***

206 The proposed approach can be employed to determine metabolite concentration ranges by  
207 using information about full coupling of reactions, fluxes entering relevant flux ratios, and the  
208 relevant reaction rate constants. To validate the predictions, we employ a detailed kinetic model  
209 of elementary metabolic reactions of *E. coli* [8] from which these inputs are readily available.  
210 Of the 830 metabolites interconverted by 1,474 elementary reactions in the model, our  
211 approach determines that 23 metabolites exhibit SCC. The ranges for these SCC metabolites  
212 are fully determined by 67 relevant rate constants (4.6% of all rate constants) and fluxes of 67  
213 reactions (4.6% of all reactions) which enter in the relevant flux ratios. We use the kinetic  
214 model to simulate 100 steady states from different initial conditions (Supplementary Table S1).

215 We determined the Euclidean distance between the predicted and simulated lower and  
216 upper bounds to demonstrate their quantitative agreement. Since metabolite concentrations  
217 vary over several orders of magnitude, the results based on Euclidean distance will be biased  
218 by the presence of very large metabolic pools; therefore, we also considered two variants of

219 relative Euclidean distance (see Materials and Methods). Our results from the quantitative  
220 comparison demonstrate a very good agreement between the predicted and simulated bounds  
221 (Supplementary Table S2, Supplementary Fig. S1). We also employ the Pearson correlation to  
222 assess if the predicted and simulated bounds agree qualitatively across the metabolites with  
223 SCC. We determine that there is a perfect qualitative match between the predicted and  
224 simulated lower (1, p-value  $< 10^{-6}$ ) and upper bounds (1, p-value  $< 10^{-6}$ ) of the SCC  
225 metabolites (Supplementary Table S2).

226         It has been recently proposed that the shadow prices of metabolites can be used to  
227 quantify the ranges of metabolite concentrations, under the assumption that the cellular system  
228 optimizes an objective [24]. To compare the performance of shadow prices as a measure of  
229 metabolite concentration ranges, we employ the stoichiometric matrix of the analyzed kinetic  
230 model by using the maximization of metabolic exchange fluxes as cellular objective, shown to  
231 outperform yield as a predictor of growth rate [25]. We did not use optimization of yield, most  
232 widely used in flux balance analysis, since the model has been parameterized without  
233 consideration of a biomass reaction. We observe that for the analyzed model and the  
234 physiologically relevant objective, the calculated shadow prices for the 23 SCC metabolites  
235 cannot be used as indicators of concentration variability due to the weak negative correlation  
236 with the concentration ranges as well as with the coefficients of variation of the SCC  
237 metabolites (Supplementary Table S2). These findings point out that our approach, in absence  
238 of a cellular objective but with knowledge about a few rate constants and selected flux ratios,  
239 outperforms the existing contender for quantifying concentration ranges in large-scale  
240 metabolic networks.

241

242

## 243 **Effects of missing information about rate constants**

244 While the full reaction couplings considered by our approach can be readily obtained given the  
245 structure of the network and flux ratios are increasingly available from labeling approaches  
246 [26], the resulting predictions can be affected by missing information about rate constants. To  
247 assess the effect of missing information on the accuracy of predictions, we consider the cases  
248 that 10 – 90% of rate constants used in the derivation of the ranges for the metabolites with  
249 SCC are known (see Methods). We consider three scenarios whereby the missing ratios of rate  
250 constants, appearing in Eq. (1), are substituted by: (i) a value of one, simulating a scenario in  
251 which all relevant rate constants are of the same value, (ii) the mean, or (iii) the median of the  
252 ratios of relevant rate constants that are present (*i.e.*, known) in the model equation from which  
253 the conditions for SCC are established. We note that the units of the rate constants are not  
254 relevant since rate constants enter Eq. (1), above, as ratios.

255 We find that the substitutions for the missing ratios of rate constants according to the  
256 three scenarios, as expected, decrease the Pearson correlation between predicted and simulated  
257 ranges over 100 instances of models in which relevant rate constants were removed at random  
258 (Fig. 2). Nevertheless, even when only 30% of the relevant rate constants are known for the  
259 cases (i) and (iii), we obtain a median Pearson correlation coefficient between the predicted  
260 and simulated ranges of at least 0.6 (Fig. 2). Substituting the missing ratio of rate constants  
261 with the mean of the ratios shows the largest variability over the 100 instances of models with  
262 partial knowledge of rate constants. The reason for this finding is that the distribution of rate  
263 constants and their ratios are highly left-skewed (Supplementary Fig. S2). Therefore, we  
264 conclude that even in the absence of information about rate constants that matches the current  
265 state-of-the-art of knowledge about *E. coli* (Supplementary Table S3), our approach provides  
266 qualitatively reliable estimates of concentration ranges in large-scale models. The ordering of  
267 lower and upper bounds between metabolites can be predicted well (median significant

268 Spearman correlation above 0.75 at significance level of 0.05 for all scenarios). However, we  
269 observe that the median over relative and log-transformed Euclidean distances between  
270 predicted and simulated lower as well as upper bounds over the 23 SCC metabolites are small  
271 ( $<0.71$  and  $<0.08$ , respectively) when more than 50% of the relevant rate constants are known  
272 (Supplementary Fig. S3-S6). Therefore, the approach can be used for the frequently employed  
273 comparison of metabolite concentration ranges within and between conditions.

274

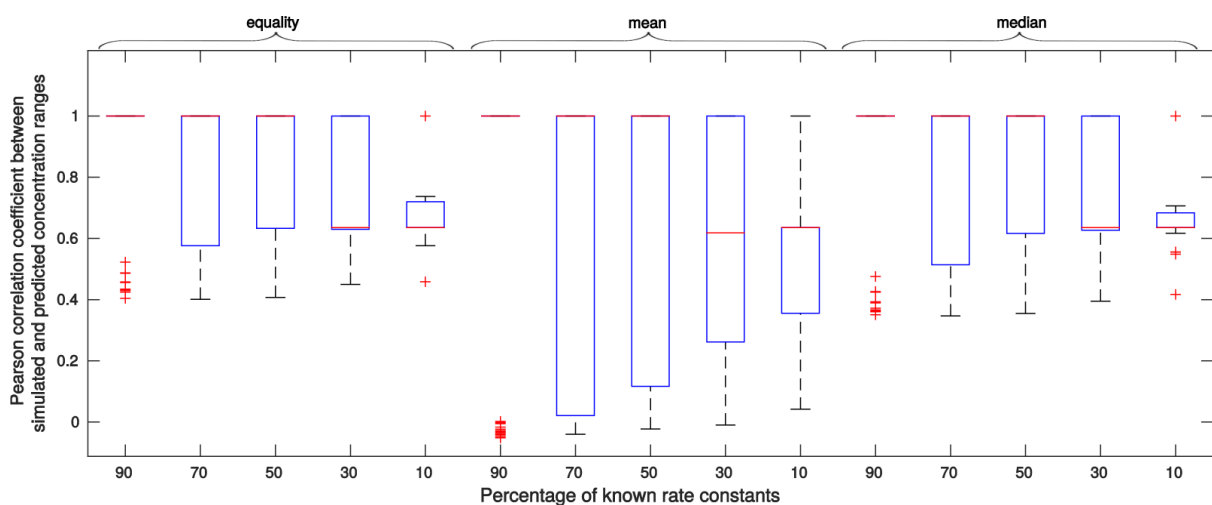

275

276 **Fig. 2. Effect of missing information about relevant rate constants on the accuracy of**  
277 **concentration range predictions for a large-scale kinetic model of *E. coli*.** We consider 10  
278 – 90% of the relevant rate constants to be unknown by random removal. We consider three  
279 scenarios for the substitution of missing ratios of rate constants: (i) equality (i.e., kinetic rate  
280 constants are assumed to be the same), (ii) the mean, or (iii) the median of the ratios of relevant  
281 rate constants that are still present in the model. Shown are the boxplots (red lines inside each  
282 box denote the corresponding medians) of the resulting Pearson correlation coefficients  
283 between the predicted and simulated ranges over the SCC metabolites in the kinetic model of  
284 *E. coli*.

285

## 286 **Effect of missing information about flux ratios**

287 We also investigate the accuracy of the predictions of concentration ranges when full  
288 information about relevant rate constants is available and relevant flux ratios are obtained from  
289 constraint-based modeling approaches. To obtain physiologically relevant predictions, we  
290 constrain the model with the simulated exchange fluxes (Supplementary Table S1), since they  
291 can be readily obtained from experiments (e.g. by following substrate depletion). As the  
292 employed kinetic model does not specify a biomass reaction, we optimize a weighted average  
293 of ATP production and total flux, known to lead to predictions in line with flux estimates from  
294 labeling experiments [2]. To this end, we determine the range for the relevant flux ratios at the  
295 optimal value for the objective and used them together with Eq. (2) to obtain concentration  
296 ranges for the 23 SCC metabolites (Materials and Methods). We find that for 13 out of 23 SCC  
297 metabolites the predicted concentration range reside inside the respective simulated range. For  
298 additional 6 metabolites the ranges overlap, while the remaining metabolites show no overlap  
299 in the predicted and simulated range using the objective of optimized ATP production and total  
300 flux (Fig. 3). Since the approach provided accurate quantitative and qualitative predictions  
301 with perfect information in the case of kinetic modeling, the discrepancy is due to the objective  
302 used to constrain the physiologically reasonable fluxes.

303

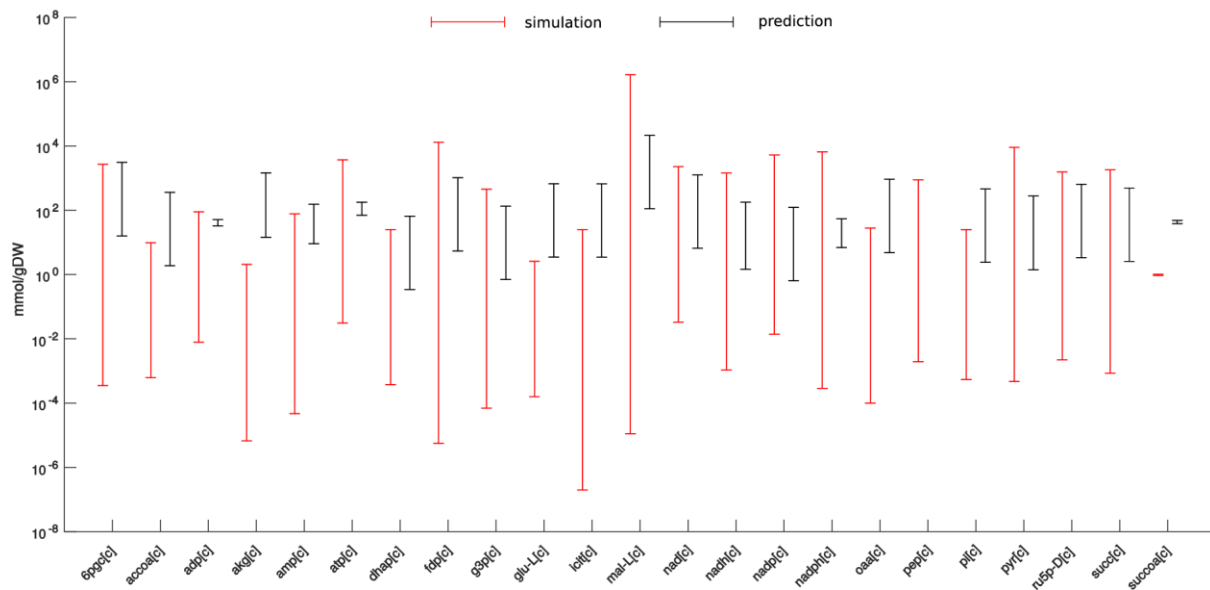

304

305 **Fig. 3. Effect of missing information about relevant flux ratios on the accuracy of**

306 **concentration range predictions for a large-scale kinetic model of *E. coli*.** Relevant flux

307 ratios are obtained by constraint-based modeling in which the objective of weighted ATP

308 production and total flux is maximized. Red bars denote simulated ranges resulting from 100

309 different initial conditions of the large-scale kinetic model of *E. coli*. Black bars denote the

310 predicted ranges following Eq. (2). Concentration ranges are predicted for 23 SCC metabolites

311 in the employed metabolic model.

312

### 313 **Concentration ranges in a genome-scale metabolic model of *E. coli***

314 Arguably the most interesting scenario for application of our approach is with genome-scale

315 metabolic networks. We find 199 SCC metabolites in the cytosol and 168 in the periplasm and

316 extracellular space of the most recent genome-scale metabolic network of *E. coli* [27]

317 (Supplementary Table S8). However, for this model, we observe that there are data available

318 for only 28% of relevant rate constants (Supplementary Table S3), and we have no estimates

319 of the relevant flux ratios available from labeling experiments [28-30]. Therefore, the approach

320 cannot be used without extensions. Given a steady-state flux distribution,  $v$ , the concentration

321 of a SCC metabolite  $X_i$  is given by  $x_i = \frac{\sigma_p}{\sigma_s} \frac{v_p}{v_s}$ . If we have data on concentration of SCC  
322 metabolites and flux predictions from the constraint-based modeling framework, we can  
323 readily obtain estimates for the ratio  $\frac{\sigma_p}{\sigma_s}$ . By definition, this ratio is invariant over the conditions  
324 where all steady-state fluxes appearing in relevant flux ratios are non-zero. Therefore, we can  
325 use the estimates for  $\frac{\sigma_p}{\sigma_s}$  together with flux predictions to make predictions about concentration  
326 ranges following Eq. (2) for another scenario. We note that the prediction about concentration  
327 ranges inherit the uncertainty in the estimation of  $\frac{\sigma_p}{\sigma_s}$  as well as the flux ratios from flux balance  
328 analysis, which may contribute to the size of the predicted ranges.

329 **Metabolite concentration data set of Ishii et al. [28].** We use the measurements of steady-state  
330 concentrations of 182 metabolites from *E. coli* under different growth scenarios [28]. This data  
331 set includes 15 of the 199 cytosolic SCC metabolites found in the genome-scale model. We  
332 also have access to rates of glucose and oxygen uptakes, carbon dioxide release as well as  
333 growth from the same experiments [28], which we use as constraints to a genome-scale  
334 metabolic network of *E. coli*. It has been shown that *E. coli* does not optimize a single objective  
335 (e.g., growth), but its steady-state flux distributions result from the trade-off between tasks of  
336 optimizing growth, ATP synthesis, and total flux [2]. Since growth rate is fixed from  
337 measurements, we optimize the weighted average of ATP synthesis and total flux, with a  
338 weighting factor of 0.1 on ATP synthesis to reduce the effect of the order difference in the  
339 respective optimum observed when ATP production and total flux are optimized individually.  
340 Here, too, at the obtained optimum we can efficiently estimate ranges for the relevant flux  
341 ratios (Materials and Methods). In addition, we compare obtained concentration ranges with  
342 those predicted when maximization of ATP is used as the only objective. To obtain estimates  
343 for  $\frac{\sigma_p}{\sigma_s}$ , we use three replicates for the concentration data and predictions of ranges for relevant  
344 flux ratios at growth rate of  $0.2h^{-1}$  (Supplementary Table S4). Eq. (2) can then be applied to



345 determine concentration ranges based on  $\frac{\sigma_p}{\sigma_s^i}$  for a combination of replicates, to investigate the  
346 effect of outliers. We predict in turn the concentration ranges for three other growth rates (i.e.,  
347 0.4, 0.5, and  $0.7h^{-1}$ ).

348 For the objective of optimizing ATP synthesis and total flux, our results demonstrate  
349 that measurements for 9, 10, and 6 of the 15 SCC metabolites fall in the predicted concentration  
350 range for the three growth rates, respectively (Fig. 4). Nevertheless, the Spearman correlation  
351 between the measured values and the predicted lower and upper bounds is significant and larger  
352 than 0.57 and 0.56, respectively (Supplementary Table S5). Therefore, the approach can be  
353 used to compare the ordering of lower or upper bounds between different experimental  
354 scenarios (Supplementary Fig. S7). In addition, this analysis highlights the effect of the  
355 replicates of metabolite concentrations used in calculating the values of  $\frac{\sigma_p}{\sigma_s^i}$ , since estimates for  
356 some of the replicates may be outliers (Fig. 4). In contrast, we find that 4, 5 and 2 of the 15  
357 SCC metabolites fall in the measured range for the three growth rates when maximization of  
358 ATP is used as objective (Supplementary Fig. S9). Moreover, we cannot predict concentrations  
359 for 8 out of the 15 SCC metabolites due to numerical instabilities arising when using this  
360 objective under the additionally imposed constraints on growth. The reasons for the  
361 discrepancy between the predicted and measured values under both objectives include the  
362 combination of at least three factors: the inability to distinguish the concentrations of free  
363 metabolites from those bound to macromolecules experimentally [31], model (and objective)  
364 inaccuracies, and the simplifying assumption of mass action kinetic. Nevertheless, the  
365 approach can be extended to consider networks with kinetic laws derived from mass action  
366 which involve enzyme forms (e.g., Michaelis-Menten, see Discussion) at cost of increased data  
367 requirements for application.

368

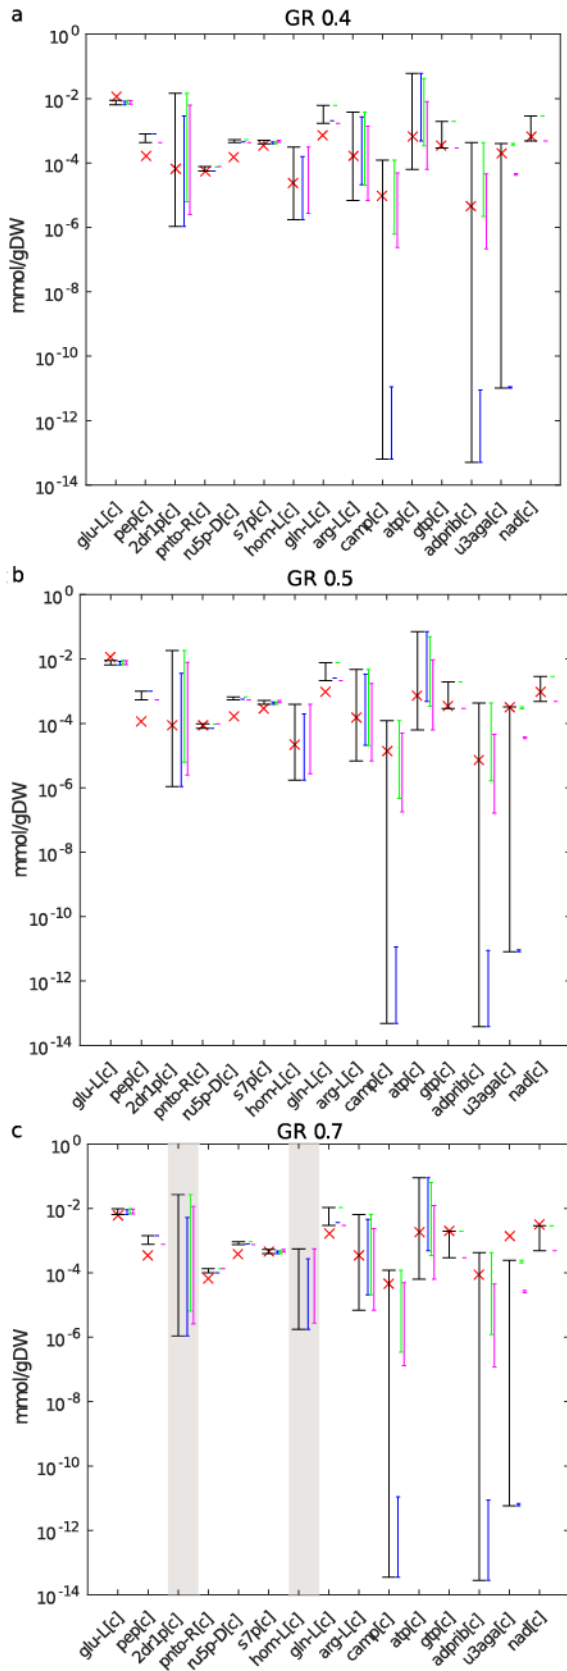

369

370 **Fig. 4. Comparison of predicted ranges with measured metabolite concentrations under**

371 **the objective of optimizing ATP synthesis and sum of total flux. Comparison of the**

372 predicted concentration ranges for 15 intracellular metabolites in *E. coli* with absolute  
373 concentrations measured at growth rates (GR) of (a) 0.4, (b) 0.5 and (c)  $0.7h^{-1}$ . For metabolites  
374 with grey background, there is no access to measurements. The colored bars denote the  
375 predicted ranges from each of the three different replicates, while the black bar represents the  
376 prediction over all replicates. The red cross denotes the measured value at the respective GR.  
377 For some metabolites there is no overlap between the colored bars, indicating poor  
378 reproducibility over the replicates in the reference scenario. The nomenclature of the  
379 metabolites is provided in Supplementary Table S5.

380

381 **Metabolite concentration data set of Gerosa et al. [32].** We use the measurements of steady-  
382 state concentrations of 43 metabolites from *E. coli* grown in eight different carbon sources [32].  
383 This data set includes ten of the 199 cytosolic SCC metabolites found in the genome-scale  
384 model. We also have access to rates of carbon uptake, some secretion rates, as well as growth  
385 from the same experiments (see Supplementary Table S10), which we use as constraints to a  
386 genome-scale metabolic network of *E. coli*. Since growth rate is fixed from measurements, as  
387 above, we optimize the weighted average of ATP synthesis and total flux, with weighting  
388 factors 0.001 for ATP synthesis and 1000 for total flux to reduce the effect of the order  
389 difference and make the comparison to optimization of ATP synthesis. Different weighting  
390 factors are used in comparison to the analysis of the data set from Ishii et al., above, since  
391 different constraints are used that affect the optimal values of the individual objectives. Here,  
392 too, at the obtained optimum we can efficiently estimate ranges for the relevant flux ratios  
393 (Materials and Methods). To obtain estimates for  $\frac{\sigma_p}{\sigma_s}$ , we use the metabolite concentrations  
394 from growth on acetate (Supplementary Table S10). We then predict the concentration ranges  
395 for the ten SCC metabolites for the seven other carbon sources (Supplementary Fig. S10, S11).

396 In Supplementary Figures S10 and S11 measured concentration ranges are denoted by red bars  
397 and predicted concentration ranges are shown in black. In case of succinate as only carbon  
398 source we obtain a model with no feasible solution, so no concentrations could be predicted for  
399 that case without further model adaptations. In the remaining growth conditions, depending on  
400 the objective and growth condition analyzed, three to five predictions of concentrations resulted  
401 in minimum values larger than the respective maximum (missing black bars). This observation  
402 is a result of numerical instabilities occurring if flux values  $v_p$  and  $v_s^{-i}$  in Eq. (1) differ by  
403 several orders of magnitude. The Spearman correlation between the average measured and  
404 predicted concentrations (Fig. 5) when optimizing ATP synthesis is 0.63 (p-value  $3 \cdot 10^{-4}$ ),  
405 while it is only 0.33 (p-value 0.03) when ATP synthesis and total flux are optimized. In  
406 addition, the Spearman correlation between the measured and predicted upper and lower  
407 bounds when maximization of ATP is used results in higher correlation values (upper bounds  
408 0.61 (p-value  $4.3 \cdot 10^{-4}$ ), lower bounds 0.85 (p-value  $5.9 \cdot 10^{-9}$ )) than those when optimization  
409 of ATP synthesis and total flux are employed (upper bounds 0.21 (p-value 0.17), lower bounds  
410 0.54 (p-value  $1.6 \cdot 10^{-4}$ )). These findings imply that the usage of different objectives to estimate  
411 flux ratios and through them concentrations of metabolites can also be used to discern  
412 importance of optimized objectives in a particular experiment.

413

414

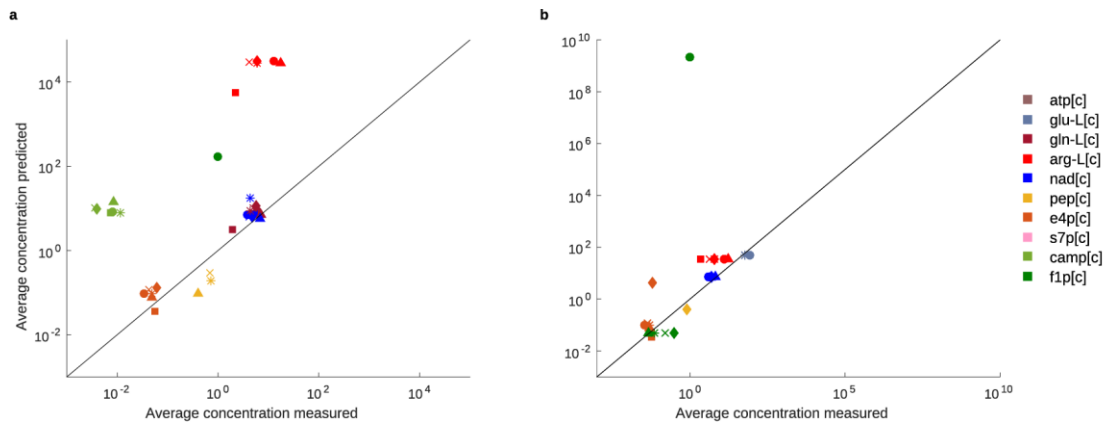

415

416 **Fig. 5. Average measured and predicted concentration of SCC metabolites under**

417 **different carbon sources.** Each data point represents a SCC metabolite (different colors, see

418 legend) under one carbon source (● fructose, ■ galactose, ◆ glucose, \* glycerol, × gluconate,

419 ▲ pyruvate). Note that due to numerical instabilities a concentration could not be calculated

420 for all (SCC metabolite, carbon source) combinations, see also Supplementary Fig. S10, S11;

421 (a) concentration prediction using optimization of ATP synthesis and total flux (Spearman

422 correlation 0.33) (b) concentration prediction using optimization of ATP synthesis (Spearman

423 correlation 0.63).

424

## 425 **Changes in metabolite concentrations in knock-out mutants**

426 The fully parameterized kinetic model of *E. coli* can be used to test the applicability of the

427 approach to predict changes in metabolite concentrations in metabolic engineering scenarios.

428 Here, we test the performance of the approach with knock-out mutants based on the following

429 procedure: We make use of the model parameterization to simulate a steady-state concentration

430 and flux distribution from initial physiologically reasonable values for metabolite

431 concentrations. The resulting steady-state concentrations and fluxes yield a wild type reference.

432 We then knock-out each reaction and predict positive steady state flux distribution closest to

433 the wild type reference, following the Minimization of Metabolic Adjustment (MOMA)

434 approach [33]. The resulting flux distribution is used to calculate the concentrations of the 23  
435 SCC metabolites following our approach (Eq. (1)). In the last step, the predicted changes in  
436 concentration of the SCC metabolites with respect to the reference are compared to the changes  
437 from kinetic simulations of the knock-out with the wild-type reference specifying the initial  
438 conditions. We observe similar ranges for the predicted and simulated fold-changes in SCC  
439 concentration over all 23 SCC metabolites and knock-outs of 929 reactions for which we were  
440 able to simulate a steady-state knock-out flux distribution (Figure 6, fold changes for individual  
441 SCC metabolites are shown in Supplementary Figure 12). We grouped the fold-changes into  
442 12 bins, given in the x-axis of Figure 6. For ten SCC metabolites, the predicted fold change of  
443 at least 29% of the knock-outs is in the same bin as the simulated fold change. The highest  
444 overlaps are observed for AMP (39%), phosphoenolpyruvate (38%) and isocitrate (37%). In  
445 contrast, the fold changes in concentration for metabolites like succinyl-CoA, acetyl-CoA,  
446 oxaloacetate, malate and pyruvate are in the same class as simulated for at most 1% of the  
447 knock-outs. The lack of correspondence between simulated and predicted concentrations for  
448 some SCC metabolites (Supplementary Fig. S12) indicates that principles others than those  
449 used in MOMA shape the metabolic adjustment of knock-out mutants.

450

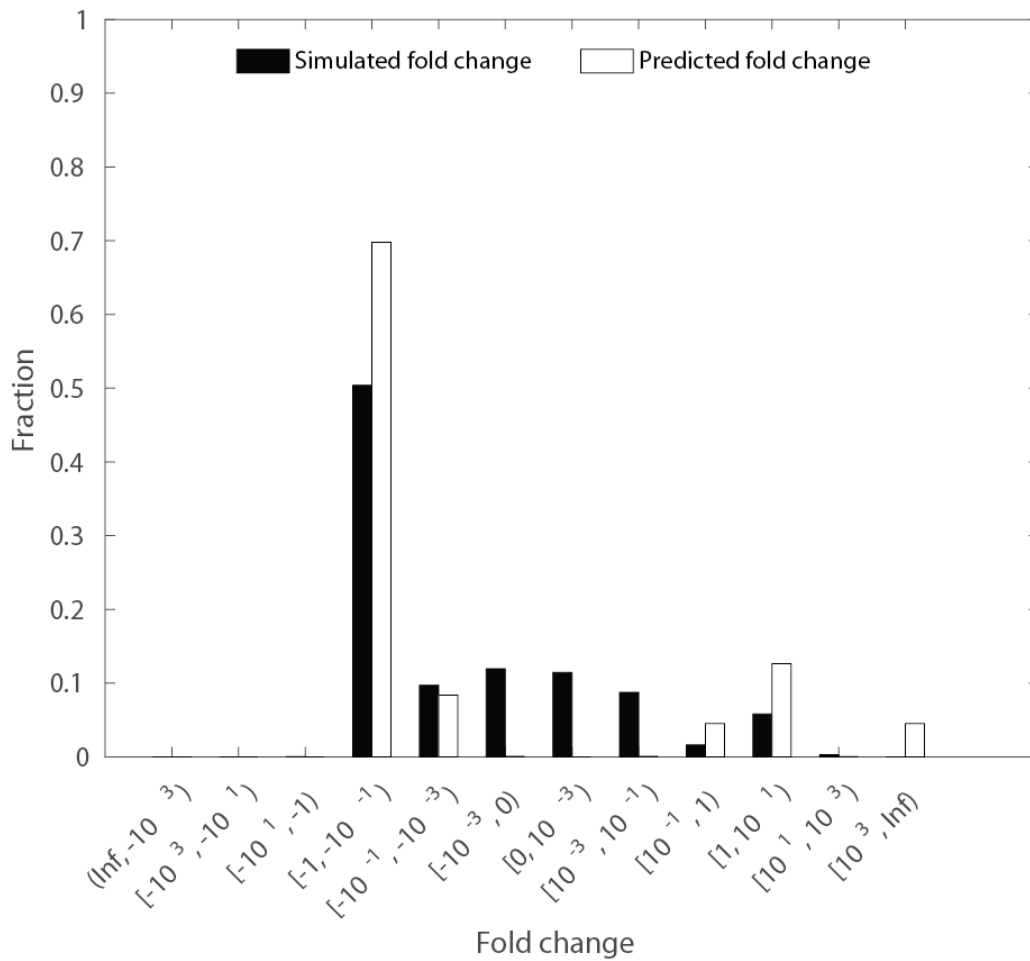

451

452 **Fig. 6. Fold change in concentration of SCC metabolites upon reaction knock-out.** The  
453 distribution of predicted and simulated fold change in concentration of 23 SCC metabolites  
454 over 929 single knock-out mutants for which a steady-state flux distribution could be  
455 simulated.

456

#### 457 **Metabolites with SCC across species**

458 We next apply Eq. (1) to 14 large-scale metabolic networks which differ in complexity due to  
459 the number of considered metabolites and reactions as well as their organization in subcellular  
460 compartments (Supplementary Table S6). The investigated metabolic networks are mass- and  
461 charge-balanced and support positive steady-state reaction rates (see Methods). Since reliable  
462 kinetic information and measurements of absolute concentration measurements are currently

463 missing across diverse species, we report only the number of the metabolites with SCC across  
464 the analyzed large-scale networks.

465 We find that the percentage of metabolites with SCC ranges from 7.74 % and 8.02% in  
466 the models of *N. pharaonis* and *C. reinhardtii* to 33.66% and 36.53% in the models of *A.*  
467 *thaliana* and *Y. pestis* (Fig. 7a). Interestingly, the number of metabolites with SCC scales  
468 linearly with the total number of metabolites (Fig. 7b,  $R^2 = 0.82$ ) and the number of reactions  
469 in the examined networks (Fig. 7c,  $R^2 = 0.76$ ). This finding indicates that the proposed  
470 approach is not limited to networks of a particular size.

471

472

473

474



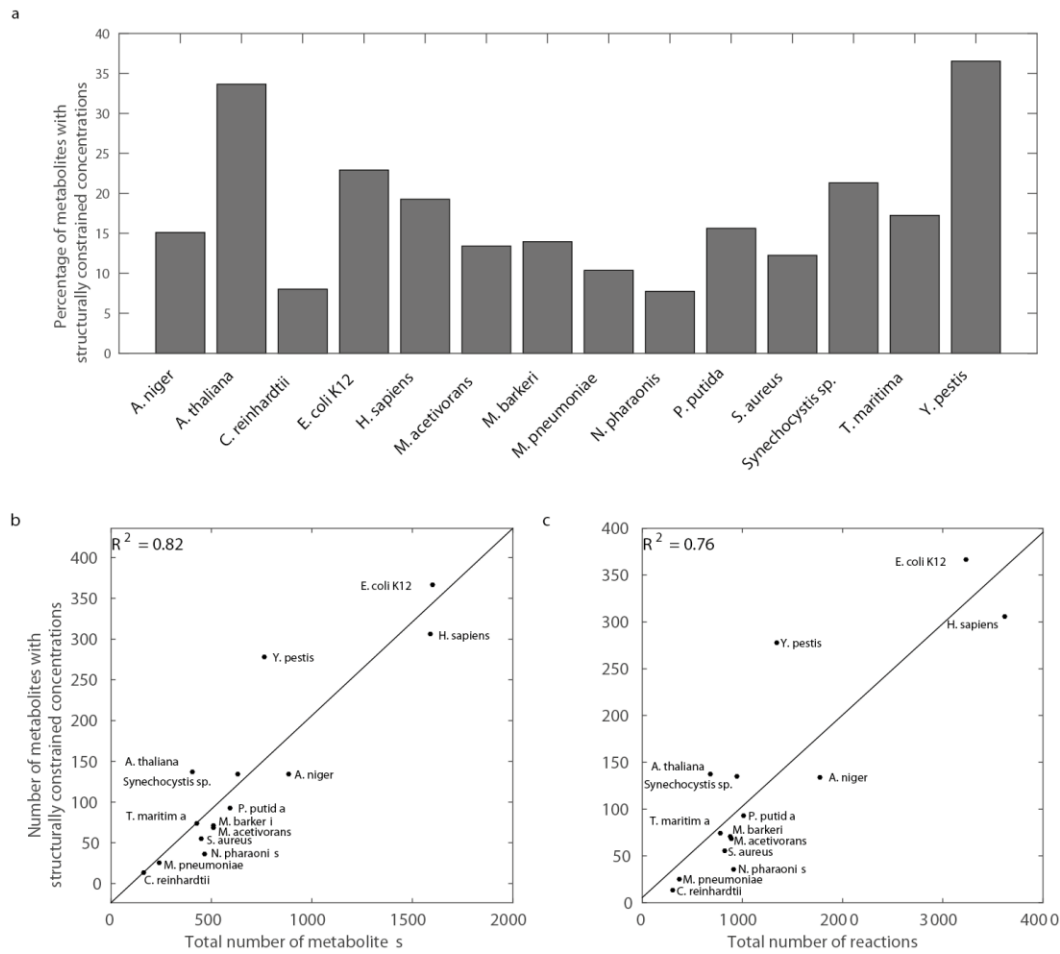

475

476 **Fig. 7. Metabolites with structurally constrained concentration across species.** (a) The  
 477 fraction of metabolites with structurally constrained concentrations in 14 large-scale metabolic  
 478 networks from all kingdoms of life. The number of these metabolites scales linearly with (b)  
 479 the total number of metabolites ( $R^2 = 0.82$ ) and (c) the total number of reactions ( $R^2 = 0.76$ ).

480

481 Different reasons can be used to explain the observation that larger networks contain  
 482 more metabolites with SCC. For instance, larger networks may include more linear pathways,  
 483 whereby the number of reactions which are fully coupled due to structure is expected to  
 484 increase. Yet, in denser networks, which include more reactions on the same set of metabolites,  
 485 it is more likely to identify reactions which share substrates of same stoichiometry, which then  
 486 leads to full coupling due to mass action kinetics, as considered in our approach. To investigate

487 the reasons for the scaling of the number of metabolites with SCC, we determine the number  
488 of: (i) metabolites which are synthesized and used by one reaction, respectively (in support of  
489 the linear pathway explanation), (ii) fully coupled reactions only due to structure, (iii) coupled  
490 reactions due to mass action (in support of the network density explanation), (iv) the  
491 combination of (ii) and (iii), to assess the couplings due to both structure and kinetics  
492 (Supplementary Table S7). We calculate the Pearson correlation coefficient between each of  
493 these properties and the number of reactions over the analyzed networks, as a measure of  
494 network size (Supplementary Table S7). Larger networks indeed contain a bigger number of  
495 metabolites synthesized and used by a single reaction, respectively, and more reactions which  
496 are fully coupled due to both structure and kinetics. Therefore, both the linear pathway and the  
497 network density explanations contribute to the observed scaling in the analyzed networks.

498         Due to the derivation of Eq. (1), it may be expected that the approach is not applicable  
499 to metabolites which participate in a large number of reactions, since they may be less likely  
500 to be fully coupled. Nevertheless, our findings show that between 28.89% and 62.95% of the  
501 SCC metabolites in the analyzed networks are involved in more than two reactions (see  
502 Supplementary Table S6). One reason is that a SCC metabolite may also be determined by  
503 applying Eq. (1) to the ODE of another metabolite (see Eq. (2) and Fig. 1c).

504         Since changes in relevant fluxes directly affect the concentration of a SCC metabolite,  
505 they can be used to tightly control the concentration range. For essential metabolic processes  
506 to be carried out efficiently, metabolites that serve as coenzymes and energy currency of  
507 biological systems, namely, the oxidized and reduced version of NAD and NADP as well as  
508 the adenosine phosphates (i.e. AMP, ADP, ATP), are maintained within certain concentration  
509 ranges that can be readily controlled, as is the case for SCC metabolites. Despite the many  
510 biochemical reactions in which these ubiquitous metabolites participate (Supplementary Table  
511 S8), all of which must satisfy our conditions in order to invoke Eq. (1), we find that the

512 (sub)cellular concentrations of ATP and NAD are indeed structurally constrained in twelve and  
513 ten of the analyzed networks, respectively. This implies that the network structure, alongside  
514 the relevant rate constants and relevant flux ratio, imposes boundaries on and facilitates simple  
515 control over their concentrations. In addition, we find that NADP shows SCC in four of the  
516 investigated networks, including *A. thaliana* and *C. reinhardtii* (Table 1 and Supplementary  
517 Table S8). In these photosynthetic organisms, NADPH is produced by ferredoxin-NADP+  
518 reductase in the last step of the electron transport chain which constitutes the light reactions of  
519 photosynthesis [34]. The produced NADPH provides reducing power for the biosynthetic  
520 reactions in the Calvin cycle to fix carbon dioxide as well as in the reduction of nitrate into  
521 ammonia for plant assimilation in the nitrogen cycle. Therefore, precise and simple control of  
522 NADPH will provide uninterrupted functionality of these key metabolic pathways and  
523 maintenance of carbon and nitrogen balance [35]. In addition, for ten models, we find that H+  
524 is SCC, ensuring maintenance of the specific functions of individual organelles [36].  
525 Altogether, our findings indicate that the concentration ranges for coenzymes and other  
526 components essential for fueling metabolism can be established by controlling few ratios of  
527 fluxes, despite their involvement in hundreds of reactions. Moreover, they imply that the  
528 network architecture may be organized such that the concentrations of these metabolites are  
529 intrinsically constrained and easy to control.

530

531

532

533

534

535 **Table 1. Structurally constrained concentrations for metabolites serving as energy**  
 536 **currency.** (h=chloroplast, c = cytosol, m = mitochondria, n = nucleus, p = periplasm, e =  
 537 extracellular space). The table summarizes the networks in which Eq. (1) holds for NADH,  
 538 NAD, NADP, NADPH, ATP, and H<sup>+</sup>. The table includes the respective compartments in  
 539 which Eq. (1) can be applied for the investigated metabolites.

| Network                                        | NADH | NAD | NADP | NADPH | ATP   | H <sup>+</sup> |
|------------------------------------------------|------|-----|------|-------|-------|----------------|
| <i>A. niger</i>                                |      | c   | c    | c     | c     |                |
| <i>A. thaliana</i>                             |      |     | h    |       | h,c,m |                |
| <i>C. reinhardtii</i>                          |      |     | h    |       | h     | h,c            |
| <i>E. coli K12</i>                             |      | c   |      |       | c     | c,p            |
| <i>H. sapiens</i>                              | c    | c   |      | c     | c,n   | c              |
| <i>M. acetivorans</i>                          |      | c   |      |       | c     | c              |
| <i>M. barkeri</i>                              |      | c   |      |       | c     | c              |
| <i>M. pneumoniae</i>                           |      |     |      |       |       |                |
| <i>N. pharaonic</i>                            |      | c   |      |       | c     |                |
| <i>P. putida</i>                               |      |     |      |       | c     | c,e            |
| <i>T. maritima</i>                             |      | c   | c    |       | c     | c,e            |
| <i>S. aureus</i>                               |      | c   |      |       |       | c,e            |
| <i>Synechocystis sp.</i>                       |      | c   |      |       | c     | c,p            |
| <i>Y. pestis</i>                               |      | c   |      |       | c     | c              |
| Number of networks where Eq.(1) can be applied | 1    | 10  | 4    | 2     | 12    | 10             |

540

## 541 Discussion

542 Genome-scale metabolic networks have propelled the understanding of the metabolic  
 543 capabilities for a wide variety of organisms across all kingdoms of life. The existing large-scale  
 544 modelling approaches examine the space of feasible fluxes, but cannot be used to infer the  
 545 metabolite concentrations driving these fluxes without extensively relying on largely unknown  
 546 kinetic parameters. Hence, the direct usage of large-scale metabolic networks to make

547 predictions about concentrations that are directly testable from high-throughput metabolomics  
548 data is not possible with the existing modelling approaches.

549 Here we derive a condition that pinpoints that the structure of a metabolic network,  
550 ratios of relevant rate constants, and ratios of relevant reaction fluxes constitute the determinant  
551 of concentration ranges for selected metabolites. This link is based on the well-known concept  
552 of full coupling of reactions [21, 23] which we expand under the assumption of mass action  
553 kinetics to include reactions that share substrates of same stoichiometry. These concepts allow  
554 us to efficiently determine the admissible concentration ranges in large-scale metabolic  
555 networks endowed with mass action kinetics across all kingdoms of life. The derivation of Eq.  
556 (1) can be generalized by considering reactions which differ in order larger than one with  
557 respect to a single metabolite. For a given flux distribution this approach results in a polynomial  
558 equation in a single variable which can be efficiently solved with the Newton's method.

559 Our approach is also applicable to networks with kinetic laws derived from mass action  
560 which involve enzyme forms (e.g., Michaelis-Menten). This can be achieved by augmenting  
561 the network to include reactions which model substrate-enzyme complex formation as well as  
562 the synthesis and degradation of enzymes. However, these extensions come at a cost of  
563 substantially larger data sets which are not yet readily available. In addition, our analyses  
564 demonstrate that the casting of a kinetic rate law in terms of mass action mechanisms may  
565 affect the findings regarding the SCC metabolites. For instance, we find that there are many  
566 more SCC metabolites in comparison to other SCC components (i.e., enzymes and enzyme-  
567 substrate complexes) in each of the analyzed models (Supplementary Table S9). With  
568 exception of the network of *C. reinhardtii*, the usage of enzymatic forms explicitly in mass  
569 action mechanisms leads to a decrease in the number of metabolites with SCC (Supplementary  
570 Table S9), due to the decrease in the number of reaction pairs which differ in their order by

571 one. Applications of the approach to other forms of kinetics will be subject in future  
572 investigations and extensions.

573 Our approach provides a links between metabolite concentrations, relevant rate  
574 constants, and relevant flux ratios; therefore, information on two of these can be used to predict  
575 the third. Our analyses demonstrate that there is a good quantitative agreement between  
576 predicted and simulated concentration ranges based on full knowledge of rate constants from a  
577 kinetic model of *E. coli*. Rate constants of elementary reactions are expected to become  
578 increasingly available for model organisms, largely due to the development of computational  
579 methods coupled with high-throughput data [8, 9]. In addition, by examining the scenario  
580 where flux ratios are estimated from the constraint-based modeling framework, we observe  
581 that the approach can be used to select which objective function (or a combination thereof) is  
582 optimized by a biological system for which metabolite concentration measurements are  
583 available.

584 Most importantly, we show that even in the absence of data on relevant rate constants  
585 and relevant flux ratios, we can apply the approach to successfully predict concentration ranges  
586 in *E. coli* under different growth conditions, provided measurements of concentrations for SCC  
587 metabolites in one reference condition. Therefore, the proposed approach represents an  
588 important step in complementing genome-scale metabolic networks with metabolite  
589 concentrations, widening the applicability of large-scale models to a range of biotechnological  
590 and medical applications.

## 591 **Materials and Methods**

### 593 **Components with structurally constrained concentrations**

594 A metabolic network can be represented by the stoichiometric matrix,  $N = N^+ - N^-$ , where  
595  $N^+$  includes the stoichiometry of the products and  $N^-$  comprises the stoichiometry of the

596 substrates of each reaction. In the following, we derive the conditions for structurally  
 597 constrained robustness of component  $X_i$  based on the ordinary differential equation (ODE) for  
 598 the component  $X_j$  (not necessarily different from  $X_i$ ) under the assumption that the reaction  
 599 rates,  $v(t)$ , satisfy mass action kinetics, whereby  $v_i(t) = \theta_i \prod_j x_j^{N_{ji}^-}$ . Let the ODE be  
 600 specified by  $\frac{dx_j(t)}{dt} = \sum_{k \in P_j} N_{jk}^+ v_k(t) - \sum_{l \in S_j} N_{jl}^- v_l(t)$ , where  $P_j$  is the set of reactions with  $X_j$   
 601 as one of their products and  $S_j$  is the set of reactions which have metabolite  $X_j$  as one of their  
 602 substrates.

603 We consider the following two cases: (i) the concentration of  $X_i$  appears in every  $v_k(t)$   
 604 for which  $N_{jk}^+ \neq 0$  and for every  $v_k(t)$  there exist a set  $P_j^{-i}$  of reactions  $R_k^{-i} \in P_j^{-i}$  such that  
 605  $v_k(t) = x_i(t) \frac{\theta_k}{\theta_k^{-i}} v_k^{-i}(t)$  and (ii) the concentration of  $X_i$  appears in every  $v_l(t)$  for which  $N_{jl}^- \neq$   
 606 0 and for every  $v_l(t)$  there exist a set of reactions  $R_l^{-i} \in S_j^{-i}$  such that  $v_l(t) = x_i(t) \frac{\theta_l}{\theta_l^{-i}} v_l^{-i}(t)$ .

607

### 608 **Case I:**

609 The rates of a reaction  $R_k$  and a reaction from the set  $R_k^{-i}$  are given by

$$610 \quad v_k(t) = \theta_k \prod_j x_j^{N_{jk}^-}(t) = \theta_k \prod_{j \neq i} x_j^{N_{jk}^-}(t) x_i^{N_{ik}^-}(t) = \theta_k x_i(t) \prod_{j \neq i} x_j^{N_{jk}^-}(t) x_i^{N_{ik}^- - 1}(t)$$

611 and

$$612 \quad v_k^{-i}(t) = \theta_k^{-i} \prod_j x_j^{N_{jk}^-}(t) = \theta_k^{-i} \prod_{j \neq i} x_j^{N_{jk}^-}(t) x_i^{N_{jk}^-}(t).$$

613 From rewriting the equation of  $v_k^{-i}(t)$  above we have that  $\prod_{j \neq i} x_j^{N_{jk}^-}(t) = \frac{v_k^{-i}(t)}{\theta_k^{-i} x_i^{N_{jk}^-}(t)}$ . Since

614  $N_{jk}^- - N_{jk}^{-i} = 0$  for every  $j \neq i$  and  $N_{ik}^- - N_{ik}^{-i} = 1$  we can rewrite the equation of  $v_k(t)$  such

615 that

$$616 \quad v_k(t) = \frac{\theta_k}{\theta_k^{-i}} x_i(t) v_k^{-i}(t) x_i^{N_{ik}^- - N_{ik}^{-i} - 1}(t) = \frac{\theta_k}{\theta_k^{-i}} x_i(t) v_k^{-i}(t).$$

617

618 The ODE for component  $X_j$  revealing structurally constrained concentration of  
 619 component  $X_i$  is then given by:

$$620 \quad \frac{dx_j(t)}{dt} = \sum_{k \in P_j} N_{jk}^+ v_k(t) - \sum_{l \in S_j} N_{jl}^- v_l(t) = x_i(t) \sum_{k \in P_j} N_{jk}^+ \frac{\theta_k}{\theta_k^{-i}} v_k^{-i}(t) - \sum_{l \in S_j} N_{jl}^- v_l(t).$$

621 Let  $p$  and  $s$  bet two reaction indices such that  $N_{jp}^+ \neq 0$  and  $N_{js}^- \neq 0$ . In any positive state  $v(t)$ ,  
 622 we have that

$$623 \quad \frac{dx_j(t)}{dt} = v_p^{-i}(t) x_i(t) \sum_{k \in P_j} N_{jk}^+ \frac{\theta_k v_k^{-i}(t)}{\theta_k^{-i} v_p^{-i}(t)} - v_s(t) \sum_{l \in S_j} N_{jl}^- \frac{v_l(t)}{v_s(t)}.$$

624 In a steady state then

$$625 \quad v_p^{-i} x_i \sum_{k \in P_j} N_{jk}^+ \frac{\theta_k v_k^{-i}}{\theta_k^{-i} v_p^{-i}} - v_s \sum_{l \in S_j} N_{jl}^- \frac{v_l}{v_s} = 0.$$

626 If for every  $N_{jp}^+ \neq 0$ ,  $\frac{v_k^{-i}}{v_p^{-i}}$  is constant because either reactions  $R_k^{-i}$  and  $R_p^{-i}$  are fully coupled or

627 share the same substrates, then  $\sum_{k \in P_j} N_{jk}^+ \frac{\theta_k v_k^{-i}}{\theta_k^{-i} v_p^{-i}} = \sigma_p^{-i}$  is a constant that only depends on a

628 subset of rate constants and the network structure. Moreover, if for every  $N_{js}^- \neq 0$ ,  $\frac{v_l}{v_s}$  is constant

629 because either reactions  $R_l$  and  $R_s$  are fully coupled or share the same substrates, then

630  $\sum_{l \in S_j} N_{jl}^- \frac{v_l}{v_s} = \sigma_s$  is a constant, too, which in the simplest case when all reactions in  $S_j$  are fully

631 coupled irrespective of the kinetic rate law, only depends on the network structure. Therefore,

$$632 \quad v_p^{-i} x_i \sigma_p^{-i} - v_s \sigma_s = 0,$$

$$633 \quad \text{and } x_i = \frac{\sigma_s}{\sigma_p^{-i}} \frac{v_s}{v_p^{-i}}.$$

634 For each reaction  $R_k$  in  $S_j$ , there exists a non-empty subset  $Q_k^{-i}$  of reactions lacking

635 one substrate molecule of  $X_i$  in comparison to  $R_k$ ; the union of all  $Q_k^{-i}$  yields the set of reactions

636  $S_j^{-i}$ . Let  $Q$  be a subset of  $P_j^{-i}$  that contains one and only one reaction from each of  $Q_k^{-i}$ . Since



637 the reaction indices  $p$  and  $s$  are arbitrarily chosen, the concentration range of metabolite  $X_i$  for  
 638 a given subset  $Q$  over a given set of flux distributions,  $F$ , is given as

$$639 \quad \min_{\{Q,F\}} \frac{v_s}{v_p^{-i}} \frac{\sigma_s}{\sigma_p^{-i}} \leq x_i \leq \max_{\{Q,F\}} \frac{v_s}{v_p^{-i}} \frac{\sigma_s}{\sigma_p^{-i}}.$$

640 **Case II:**

641 The rates of a reaction  $R_l$  and a reaction from the set  $R_l^{-i}$  are given by

$$642 \quad v_l(t) = \theta_l \prod_j x_j^{N_{jl}^-}(t) = \theta_l \prod_{j \neq i} x_j^{N_{jl}^-}(t) x_i^{N_{il}^-}(t) = \theta_l x_i(t) \prod_{j \neq i} x_j^{N_{jl}^-}(t) x_i^{N_{il}^- - 1}(t)$$

643 and

$$644 \quad v_l^{-i}(t) = \theta_l^{-i} \prod_j x_j^{N_{jl}^-}(t) = \theta_l^{-i} \prod_{j \neq i} x_j^{N_{jl}^-}(t) x_i^{N_{il}^-}(t).$$

645 From rewriting the equation of  $v_l^{-i}(t)$  above we have that  $\prod_{j \neq i} x_j^{N_{jl}^-}(t) = \frac{v_l^{-i}(t)}{\theta_l^{-i} x_i^{N_{il}^-}(t)}$ . Since

646  $N_{jl}^- - N_{jl}^{-i} = 0$  for every  $j \neq i$  and  $N_{il}^- - N_{il}^{-i} = 1$  we can rewrite the equation of  $v_l(t)$  such

647 that

$$648 \quad v_l(t) = \frac{\theta_l}{\theta_l^{-i}} x_i(t) v_l^{-i}(t) x_i^{N_{il}^- - N_{il}^{-i} - 1}(t) = \frac{\theta_l}{\theta_l^{-i}} x_i(t) v_l^{-i}(t).$$

649

650 The ODE for component  $X_j$  revealing structurally constrained concentration of component  $X_i$

651 is then given by:

$$652 \quad \frac{dx_j(t)}{dt} = \sum_{k \in P_j} N_{jk}^+ v_k(t) - \sum_{l \in S_j} N_{jl}^- v_l(t) = \sum_{k \in P_j} N_{jk}^+ v_k(t) - x_i(t) \sum_{l \in S_j} N_{jl}^- \frac{\theta_l}{\theta_l^{-i}} v_l^{-i}(t).$$

653 Let  $p$  and  $s$  bet two reaction indices such that  $N_{jp}^+ \neq 0$  and  $N_{js}^- \neq 0$ . In any positive state  $v(t)$ ,

654 we have that

$$655 \quad \frac{dx_j(t)}{dt} = v_p(t) \sum_{k \in P_j} N_{jk}^+ \frac{v_k(t)}{v_p(t)} - v_s^{-i}(t) x_i(t) \sum_{l \in S_j} N_{jl}^- \frac{\theta_l}{\theta_l^{-i}} \frac{v_l^{-i}(t)}{v_s^{-i}(t)}.$$

656 In a steady state then

$$657 \quad v_p \sum_{k \in P_j} N_{jk}^+ \frac{v_k}{v_p} - v_s^{-i} x_i \sum_{l \in S_j} N_{jl}^- \frac{\theta_l}{\theta_l^{-i}} \frac{v_l^{-i}}{v_s^{-i}} = 0.$$

658 If for every  $N_{jp}^+ \neq 0$ ,  $\frac{v_k}{v_p}$  is constant because either reactions  $R_k$  and  $R_p$  are fully coupled or  
 659 share the same substrates, then  $\sum_{k \in P_j} N_{jk}^+ \frac{v_k}{v_p} = \sigma_p$  is a constant that, in the simplest case when  
 660 all reactions in  $P_j$  are fully coupled irrespective of the kinetic rate law, depends only on the  
 661 network structure. Moreover, if for every  $N_{jl}^- \neq 0$ ,  $\frac{v_l^-}{v_s^-}$  is constant because either reactions  $R_l^-$   
 662 and  $R_s^-$  are fully coupled or share the same substrates, then  $\sum_{l \in S_j} N_{jl}^- \frac{\theta_l v_l^-}{\theta_l^- v_s^-} = \sigma_s^-$ . The  
 663 constant  $\sigma_s^-$  then only depends on a subset of rate constants and the network structure.  
 664 Therefore,

$$v_p \sigma_p - v_s^- x_i \sigma_s^- = 0,$$

665 and  $x_i = \frac{\sigma_p v_p}{\sigma_s^- v_s^-}$ .

667 For each reaction  $R_l$  in  $P_j$ , there exists a non-empty subset  $Q_l^-$  of reactions lacking one  
 668 substrate molecule of  $X_i$  in comparison to  $R_l$ ; the union of all  $Q_l^-$  yields the set of reactions  
 669  $P_j^-$ . Let  $Q$  be a subset of  $P_j^-$  that contains one and only one reaction from each of  $Q_l^-$ . Since  
 670 the reaction indices  $p$  and  $s$  are arbitrarily chosen, the concentration range of metabolite  $X_i$  for  
 671 a given subset  $Q$  over a given set of flux distributions,  $F$ , is given as

$$672 \quad \min_{\{Q,F\}} \frac{\sigma_p v_p}{\sigma_s^- v_s^-} \leq x_i \leq \max_{\{Q,F\}} \frac{\sigma_p v_p}{\sigma_s^- v_s^-}.$$

673 As a result, the ranges for steady-state concentration  $x_i$  can be expressed as a function of a set  
 674 of given flux distributions, ratios of specific fluxes and constants that depend only on the  
 675 structure of the network and values for a subset of rate constants. Since fluxes are the integrated  
 676 outcome of transcription, translation, and post-translational modifications and their interplay  
 677 with the environment and nutrient availability, our derivation provides a direct relation between  
 678 concentration ranges, flux ratios, and rate constants.

## 679 Flux coupling

680 Let  $C(N) = \{v \in \mathbb{R}^n | Nv = 0, v \geq 0\}$  be the steady-state flux cone for a given stoichiometric  
681 matrix  $N$  with  $n$  reactions, under the assumption that every reaction is irreversible. Here, we  
682 restrict our analysis to the subspace  $F \subset C(N)$  by bounding the fluxes:  $F = \{v \in \mathbb{R}^n | Nv =$   
683  $0, 0 \leq lb \leq v \leq ub\}$ , where  $lb$  and  $ub$  are lower and upper flux bounds. We will refer to  $v \in F$   
684 as the feasible flux distributions. A reaction  $R_i$  is called blocked if for every  $v \in F$ ,  $v_i = 0$ . A  
685 pair of reactions  $R_i$  and  $R_j$  is called fully coupled, if there exists  $\lambda > 0$ , such that for every  $v \in$   
686  $F$ ,  $v_i = \lambda v_j$ .

687 The minimum and maximum value for the ratio  $\frac{v_i}{v_j}$  over the flux distributions in  $F$  can  
688 be determined by the linear-fractional programming:

$$\begin{aligned} 689 \quad & \text{opt } \frac{v_i}{v_j} \\ 690 \quad & Nv = 0 \\ 691 \quad & lb \leq v \leq ub, \end{aligned}$$

692 which can be rewritten following the Charnes-Cooper transformation [37] to the following  
693 linear program:

$$\begin{aligned} 694 \quad & \text{opt } v_i \\ 695 \quad & Nv = 0 \\ 696 \quad & v_j = 1 \\ 697 \quad & t \cdot lb \leq v \leq t \cdot ub \\ 698 \quad & t \geq 0. \end{aligned}$$

699 If the minimum and maximum values for the linear program are the same, then the reactions  
700  $R_i$  and  $R_j$  are fully coupled. Such reactions can be efficiently computed for large-scale  
701 networks[4, 21].

702 In addition, under the mass action kinetics, two reactions are fully coupled in any state of the  
703 system if they share the same substrates with the same stoichiometry. This leads to additional  
704 full couplings due to the transitivity of the relations, as demonstrated in the main text.

705 **Metabolites with structurally constrained concentrations in mass action networks**

706 In the following, we present an algorithm determining SCC metabolites under the assumption  
707 of mass action kinetics:

---

708 **Input:** metabolic network, list of fully coupled reactions

709 **Output:** metabolites with structurally constrained concentration

710 **for each** metabolite  $x_i$  in the network **do:**

711      $S_i \leftarrow$  set of reactions having  $x_i$  as substrate

712      $M_i^P \leftarrow$  set of all products of the reactions in  $S_i$

713     **for each** metabolite  $x_j \in M_i^P$  **do:**

714          $S_j \leftarrow$  set of reactions having  $x_j$  as substrate

715          $P_j \leftarrow$  set of reactions having  $x_j$  as product

716          $P_j^{-i} \leftarrow$  set of reactions lacking one substrate molecule of  $x_i$  in comparison to a  
717         reaction  $R_p \in P_j$

718         **if** for each reaction in  $P_j$  there is a reaction in  $P_j^{-i}$  **and** all reactions in  $P_j^{-i}$  are  
719         fully coupled **and** all reactions in  $S_j$  are fully coupled:

720              $x_i$  has SCC

721         **end if**

722     **end for**

723      $M_i^S \leftarrow$  set of all substrates of the reactions in  $S_i$

724     **for each** metabolite  $x_j \in M_i^S$  **do:**

725          $S_j \leftarrow$  set of reactions having  $x_j$  as substrate

726          $S_j^{-i} \leftarrow$  set of reactions lacking one substrate molecule of  $x_i$  in comparison to a  
727         reaction  $R_s \in S_j$

728          $P_j \leftarrow$  set of reactions having  $x_j$  as product

729         **if** for each reaction in  $S_j$  there is a reaction in  $S_j^{-i}$  **and** all reactions in  $S_j^{-i}$  are  
730         fully coupled **and** all reactions in  $P_j$  are fully coupled:

731              $x_i$  has SCC

732         **end if**

733     **end for**

734 **end for**

---

735

736

## 737 **Correlation analysis**

738 Using a large-scale kinetic model of *E. coli* we simulate 100 steady-state flux distribution and  
739 steady-state concentrations from different initial concentrations. Initial concentrations were  
740 obtained by perturbation of the original initial concentration of a metabolite by 1, 5, 10 or 20%.  
741 We run the model until a steady-state was reached. Using the simulated steady-state flux  
742 distributions we can predict concentration ranges for 23 metabolites using Eq. (2)  
743 (Supplementary Table S1). The Pearson correlation was then calculated for (i) simulated and  
744 predicted upper bounds, (ii) simulated and predicted lower bounds, and (iii) the absolute range  
745 over simulated and predicted concentrations. In addition, we also determined the correlation  
746 between shadow price for the respective metabolites and the simulated range, as well as, to the  
747 coefficient of variation obtained over simulated concentrations (Supplementary Table S2).  
748 Moreover, we calculated the Euclidean distance between upper and lower bound from  
749 prediction and simulation, respectively. Due to the high difference in the order of magnitude  
750 over the analyzed metabolites we also calculated Euclidean distance after normalizing the data.  
751 We considered the Euclidean distance of log-transformed concentration vectors, and the  
752 Euclidean distance between the concentration vectors normalized by the respective maximum  
753 value.

## 754 **Effect of missing information on rate constants**

755 To assess the effect of missing information about rate constants on the accuracy of the predicted  
756 concentration range, we simulated missing knowledge about parameters by removing 10, 30,  
757 50, 70 or 90% of the relevant rate constants uniformly at random. We consider only removing  
758 information about relevant rate constants to avoid bias due to removal of information in parts  
759 of the network that have no effect on the predictions of the concentration ranges. We compare  
760 the Pearson and Spearman correlation coefficient between predicted and simulated

761 concentration ranges as well as the two versions of Euclidean distance for each percentage  
762 obtained over 100 random removals of rate constants.

### 763 **Effect of missing information on flux ratios**

764 To assess the effect of missing information about flux ratios on the accuracy of the predicted  
765 concentration range, we obtained relevant flux ratios from constraint-based modeling.  
766 Therefore, we solve the following linear program optimizing a weighted average of ATP  
767 production and total flux:

$$768 \quad \max z^* = v_{atp} - 0.01 \sum_i^{n-1} v_i$$

$$769 \quad Nv = 0$$

$$770 \quad v_{sim\_min} \leq v_{exchange} \leq v_{sim\_max}$$

$$771 \quad v_{min} \leq v \leq v_{max}$$

$$772 \quad v_{min} \geq \epsilon = 10^{-7}$$

773 In addition, the flux through exchange reactions is constrained by the respective minimum,  
774  $v_{sim\_min}$ , and maximum value,  $v_{sim\_max}$ , obtained over 100 simulations (Supplementary Table  
775 S1) to obtain a physiologically reasonable flux distribution. The weighting factor of 0.01 was  
776 chosen to reduce the effect of three orders of magnitude difference in the respective optimum  
777 observed when ATP production and total flux are optimized individually.

778 Next, we determine the range for the relevant flux ratios  $\frac{v_p}{v_s^i}$  at the optimum  $z^*$  using a

779 transformed linear-fractional program:

780 opt  $v_p$

$$781 \quad Nv = 0$$

$$782 \quad v_{atp} - 0.01 \sum_i^{n-1} v_i = z^*$$

783  $v_s^{-i} = 1$

784  $t \cdot v_{sim\_min} \leq v_{exchange} \leq t \cdot v_{sim\_max}$

785  $t \cdot v_{min} \leq v \leq t \cdot v_{max}$

786  $t \geq \epsilon$

787  $v_{min} \geq \epsilon = 10^{-7}$ .

788 We then used the obtained ranges for  $\frac{v_p}{v_s^{-i}}$  together with Eq. (2) to calculate concentration ranges  
789 for SCC metabolite  $X_i$ .

### 790 **Extension of the approach based on available concentration measurements**

791 Using the most recent genome-scale metabolic network of *E. coli* [27] together with  
792 measurements of steady-state concentrations from *E. coli* under different growth scenarios [28]  
793 we predict concentration ranges for 15 SCC metabolites using the following procedure. We  
794 first use the concentration measurements from three replicates at a growth rate of  $0.2h^{-1}$   
795 (reference state) together with flux ratios obtained from constraint-based modelling to estimate  
796 the ratio  $\frac{\sigma_p}{\sigma_s^{-i}}$  given that  $x_i = \frac{\sigma_p}{\sigma_s^{-i}} \frac{v_p}{v_s^{-i}}$ .

797 For each replicate we solve the following linear programs in order to obtain ranges for the  
798 relevant flux ratios  $\frac{v_p}{v_s^{-i}}$ .

799  $\max z^* = 0.1v_{atp} - \sum_i^{n-1} v_i$

800  $Nv = 0$

801  $v_{bio} = 0.2$

802  $v_{O2\ uptake} = \beta_{1,j}, 1 \leq j \leq 3$

803  $v_{Glc\ uptake} = \beta_{2,j}$

804  $v_{CO2\ release} = \beta_{3,j}$

805  $v_{min} \leq v \leq v_{max}$

806  $v_{min} \geq \epsilon = 10^{-7}$ .

807 The linear program above constrains rates of glucose and oxygen uptakes, carbon dioxide  
808 release as well as growth by values  $\beta_{i,j}$  (which differ between replicates  $j$ ,  $1 \leq j \leq 3$ ) available  
809 from measurements [28]. We optimize the weighted average of ATP synthesis and total flux.  
810 The weighting factor of 0.1 and 0.001 for ATP synthesis, for the data set of Ishii et al. [28] and  
811 Gerosa et al. [32], respectively, is chosen to reduce the effect of the order difference in the  
812 respective optimum observed when ATP production and total flux are optimized individually.  
813 In addition, we use weighting factors of 1 and 1000 for optimization of total flux in the case of  
814 Ishii et al. [28] and Gerosa et al. [32], respectively. To obtain ranges for the relevant flux ratios  
815  $\frac{v_p}{v_s^{-i}}$ , which are employed to calculate ranges for ratios  $\frac{\sigma_p}{\sigma_s^{-i}}$ , we solve the following linear program  
816 at the optimum  $z^*$ :

817 opt  $v_p$

818  $Nv = 0$

819  $v_{bio} = 0.2$

820  $v_{O_2 \text{ uptake}} = \beta_1$

821  $v_{Glc \text{ uptake}} = \beta_2$

822  $v_{CO_2 \text{ release}} = \beta_3$

823  $0.1v_{atp} - \sum_i^{n-1} v_i = z^*$

824  $v_s^{-i} = 1$

825  $t \cdot v_{min} \leq v \leq t \cdot v_{max}$

826  $v_{min} \geq \epsilon = 10^{-7}$

827  $t \geq 0$ .



828

829 From Eq. (2) we predict concentration values for *E. coli* cells with growth rates of 0.4, 0.5, and  
830  $0.7h^{-1}$  using the previously obtained estimates for ranges of  $\frac{\sigma_p}{\sigma_s^{-i}}$  together with ranges of  $\frac{v_p}{v_s^{-i}}$ . The  
831 latter can be obtained following the same procedure as described above using rates of glucose  
832 and oxygen uptakes, carbon dioxide release as well as growth for *E. coli* cells grown at rates  
833 of 0.4, 0.5, and  $0.7h^{-1}$ .

### 834 **Fold changes in SCC metabolite concentrations in knock-out mutants**

835 We use a large-scale kinetic model of *E. coli* [8] to simulate a steady-state concentration and  
836 flux distribution from initial physiologically reasonable values for metabolite concentrations  
837 provided in the original publication. The simulated steady-state concentrations and fluxes yield  
838 a wild type reference. Next, we simulate single reaction knock-outs and predict positive steady  
839 state flux distribution closest to the wild type reference, following the Minimization of  
840 Metabolic Adjustment (MOMA) approach [33] for each mutant. The resulting flux distribution  
841 is used to calculate the concentrations of the 23 SCC metabolites following Eq. (1). In addition,  
842 we simulate steady-state flux distributions and concentrations for knock-out mutants from the  
843 kinetic model using the wild type reference as initial concentrations. For 929 out of 1474  
844 reaction knock-outs we could simulate steady-state values. Based on these knock-out mutants  
845 we then compare fold changes in concentration of the SCC metabolites with respect to the  
846 reference obtained from kinetic model simulations and predictions using MOMA.

847

848

849

## 850 **Acknowledgements**

851 J.M.O.E.M., A.K., G.B., and Z.N. are supported by the Max Planck Society. The authors and  
852 the Max Planck Society have initiated a process for patenting the computational approach and  
853 findings presented in this manuscript.

854

## 855 **References**

856

- 857 1. Bordbar A, Monk JM, King ZA, Palsson BO. Constraint-based models predict metabolic and  
858 associated cellular functions. *Nature Reviews Genetics*. 2014;15(2):107-20. doi: 10.1038/nrg3643.  
859 PubMed PMID: ISI:000331894200010.
- 860 2. Schuetz R, Zamboni N, Zampieri M, Heinemann M, Sauer U. Multidimensional optimality of  
861 microbial metabolism. *Science*. 2012;336(6081):601-4. Epub 2012/05/05. doi:  
862 10.1126/science.1216882. PubMed PMID: 22556256.
- 863 3. Schellenberger J, Que R, Fleming RM, Thiele I, Orth JD, Feist AM, et al. Quantitative  
864 prediction of cellular metabolism with constraint-based models: the COBRA Toolbox v2.0. *Nature*  
865 *protocols*. 2011;6(9):1290-307. Epub 2011/09/03. doi: 10.1038/nprot.2011.308. PubMed PMID:  
866 21886097; PubMed Central PMCID: PMC3319681.
- 867 4. Hackett SR, Zanolli VR, Xu W, Goya J, Park JO, Perlman DH, et al. Systems-level analysis of  
868 mechanisms regulating yeast metabolic flux. *Science*. 2016;354(6311). Epub 2016/10/30. doi:  
869 10.1126/science.aaf2786. PubMed PMID: 27789812.
- 870 5. Kitano H. Towards a theory of biological robustness. *Molecular systems biology*. 2007;3:137.  
871 Epub 2007/09/21. doi: 10.1038/msb4100179. PubMed PMID: 17882156; PubMed Central PMCID:  
872 PMC2013924.
- 873 6. Bordbar A, Monk JM, King ZA, Palsson BO. Constraint-based models predict metabolic and  
874 associated cellular functions. *Nature reviews Genetics*. 2014;15(2):107-20. Epub 2014/01/17. doi:  
875 10.1038/nrg3643. PubMed PMID: 24430943.
- 876 7. Heinrich R, Schuster S. *The Regulation of Cellular Systems*. 1 ed: Springer US; 1996.
- 877 8. Khodayari A, Zomorodi AR, Liao JC, Maranas CD. A kinetic model of *Escherichia coli* core  
878 metabolism satisfying multiple sets of mutant flux data. *Metabolic engineering*. 2014;25:50-62. Epub  
879 2014/06/15. doi: 10.1016/j.ymben.2014.05.014. PubMed PMID: 24928774.
- 880 9. Davidi D, Noor E, Liebermeister W, Bar-Even A, Flamholz A, Tumbler K, et al. Global  
881 characterization of in vivo enzyme catalytic rates and their correspondence to in vitro kcat  
882 measurements. *Proceedings of the National Academy of Sciences of the United States of America*.  
883 2016;113(12):3401-6. Epub 2016/03/10. doi: 10.1073/pnas.1514240113. PubMed PMID: 26951675;  
884 PubMed Central PMCID: PMC4812741.
- 885 10. Press WH. *Numerical recipes in C : the art of scientific computing*. Cambridge  
886 *Cambridgeshire ; New York: Cambridge University Press; 1988. xxii, 735 p. p.*
- 887 11. Cox DA, Little J, O'Shea D. *Ideals, Varieties, and Algorithms - An Introduction to*  
888 *Computational Algebraic Geometry and Commutative Algebra*. 3 ed: Springer-Verlag New York;  
889 2007. XV, 553 p.
- 890 12. Lewis NE, Nagarajan H, Palsson BO. Constraining the metabolic genotype-phenotype  
891 relationship using a phylogeny of in silico methods. *Nature reviews Microbiology*. 2012;10(4):291-  
892 305. Epub 2012/03/01. doi: 10.1038/nrmicro2737. PubMed PMID: 22367118; PubMed Central  
893 PMCID: PMC3536058.

- 894 13. Niedenfuhr S, Wiechert W, Noh K. How to measure metabolic fluxes: a taxonomic guide for  
895 (13)C fluxomics. *Current opinion in biotechnology*. 2015;34:82-90. Epub 2014/12/23. doi:  
896 10.1016/j.copbio.2014.12.003. PubMed PMID: 25531408.
- 897 14. Johnson CH, Ivanisevic J, Siuzdak G. Metabolomics: beyond biomarkers and towards  
898 mechanisms. *Nature reviews Molecular cell biology*. 2016;17(7):451-9. Epub 2016/03/17. doi:  
899 10.1038/nrm.2016.25. PubMed PMID: 26979502.
- 900 15. Henry CS, Broadbelt LJ, Hatzimanikatis V. Thermodynamics-based metabolic flux analysis.  
901 *Biophysical journal*. 2007;92(5):1792-805. doi: 10.1529/biophysj.106.093138. PubMed PMID:  
902 17172310; PubMed Central PMCID: PMCPMC1796839.
- 903 16. Tepper N, Noor E, Amador-Noguez D, Haraldsdottir HS, Milo R, Rabinowitz J, et al. Steady-  
904 state metabolite concentrations reflect a balance between maximizing enzyme efficiency and  
905 minimizing total metabolite load. *PloS one*. 2013;8(9):e75370. doi: 10.1371/journal.pone.0075370.  
906 PubMed PMID: 24086517; PubMed Central PMCID: PMCPMC3784570.
- 907 17. Shaked I, Oberhardt MA, Atias N, Sharan R, Ruppin E. Metabolic Network Prediction of Drug  
908 Side Effects. *Cell systems*. 2016;2(3):209-13. Epub 2016/05/03. doi: 10.1016/j.cels.2016.03.001.  
909 PubMed PMID: 27135366.
- 910 18. Pharkya P, Burgard AP, Maranas CD. OptStrain: a computational framework for redesign of  
911 microbial production systems. *Genome research*. 2004;14(11):2367-76. Epub 2004/11/03. doi:  
912 10.1101/gr.2872004. PubMed PMID: 15520298; PubMed Central PMCID: PMC525696.
- 913 19. Ranganathan S, Suthers PF, Maranas CD. OptForce: an optimization procedure for identifying  
914 all genetic manipulations leading to targeted overproductions. *PLoS computational biology*.  
915 2010;6(4):e1000744. Epub 2010/04/27. doi: 10.1371/journal.pcbi.1000744. PubMed PMID:  
916 20419153; PubMed Central PMCID: PMC2855329.
- 917 20. Murray JD. *Mathematical Biology* Springer-Verlag New York; 2002.
- 918 21. Burgard AP, Nikolaev EV, Schilling CH, Maranas CD. Flux coupling analysis of genome-scale  
919 metabolic network reconstructions. *Genome research*. 2004;14(2):301-12. Epub 2004/01/14. doi:  
920 10.1101/gr.1926504. PubMed PMID: 14718379; PubMed Central PMCID: PMC327106.
- 921 22. Larhlimi A, David L, Selbig J, Bockmayr A. F2C2: a fast tool for the computation of flux  
922 coupling in genome-scale metabolic networks. *BMC bioinformatics*. 2012;13:57. Epub 2012/04/25.  
923 doi: 10.1186/1471-2105-13-57. PubMed PMID: 22524245; PubMed Central PMCID: PMC3515416.
- 924 23. Neigenfind J, Grimbs S, Nikoloski Z. On the relation between reactions and complexes of  
925 (bio)chemical reaction networks. *Journal of theoretical biology*. 2013;317:359-65. Epub 2012/10/23.  
926 doi: 10.1016/j.jtbi.2012.10.016. PubMed PMID: 23084997.
- 927 24. Reznik E, Mehta P, Segre D. Flux imbalance analysis and the sensitivity of cellular growth to  
928 changes in metabolite pools. *PLoS computational biology*. 2013;9(8):e1003195. Epub 2013/09/07.  
929 doi: 10.1371/journal.pcbi.1003195. PubMed PMID: 24009492; PubMed Central PMCID:  
930 PMC3757068.
- 931 25. Zarecki R, Oberhardt MA, Yizhak K, Wagner A, Shtifman Segal E, Freilich S, et al. Maximal  
932 sum of metabolic exchange fluxes outperforms biomass yield as a predictor of growth rate of  
933 microorganisms. *PloS one*. 2014;9(5):e98372. doi: 10.1371/journal.pone.0098372. PubMed PMID:  
934 24866123; PubMed Central PMCID: PMCPMC4035307.
- 935 26. Horl M, Schnidder J, Sauer U, Zamboni N. Non-stationary (13)C-metabolic flux ratio analysis.  
936 *Biotechnology and bioengineering*. 2013;110(12):3164-76. Epub 2013/07/19. doi:  
937 10.1002/bit.25004. PubMed PMID: 23860906.
- 938 27. Orth JD, Conrad TM, Na J, Lerman JA, Nam H, Feist AM, et al. A comprehensive genome-  
939 scale reconstruction of *Escherichia coli* metabolism--2011. *Molecular systems biology*. 2011;7:535.  
940 Epub 2011/10/13. doi: 10.1038/msb.2011.65. PubMed PMID: 21988831; PubMed Central PMCID:  
941 PMC3261703.
- 942 28. Ishii N, Nakahigashi K, Baba T, Robert M, Soga T, Kanai A, et al. Multiple high-throughput  
943 analyses monitor the response of *E. coli* to perturbations. *Science*. 2007;316(5824):593-7. doi:  
944 10.1126/science.1132067. PubMed PMID: 17379776.

- 945 29. Nanchen A, Schicker A, Sauer U. Nonlinear dependency of intracellular fluxes on growth rate  
946 in miniaturized continuous cultures of *Escherichia coli*. *Applied and environmental microbiology*.  
947 2006;72(2):1164-72. Epub 2006/02/08. doi: 10.1128/AEM.72.2.1164-1172.2006. PubMed PMID:  
948 16461663; PubMed Central PMCID: PMC1392909.
- 949 30. Park JO, Rubin SA, Xu YF, Amador-Noguez D, Fan J, Shlomi T, et al. Metabolite  
950 concentrations, fluxes and free energies imply efficient enzyme usage. *Nature chemical biology*.  
951 2016;12(7):482-9. Epub 2016/05/10. doi: 10.1038/nchembio.2077. PubMed PMID: 27159581;  
952 PubMed Central PMCID: PMC4912430.
- 953 31. Bennett BD, Kimball EH, Gao M, Osterhout R, Van Dien SJ, Rabinowitz JD. Absolute  
954 metabolite concentrations and implied enzyme active site occupancy in *Escherichia coli*. *Nature*  
955 *chemical biology*. 2009;5(8):593-9. doi: 10.1038/nchembio.186. PubMed PMID: 19561621; PubMed  
956 Central PMCID: PMCPMC2754216.
- 957 32. Gerosa L, Haverkorn van Rijsewijk BR, Christodoulou D, Kochanowski K, Schmidt TS, Noor E,  
958 et al. Pseudo-transition Analysis Identifies the Key Regulators of Dynamic Metabolic Adaptations  
959 from Steady-State Data. *Cell systems*. 2015;1(4):270-82. doi: 10.1016/j.cels.2015.09.008. PubMed  
960 PMID: 27136056.
- 961 33. Segre D, Vitkup D, Church GM. Analysis of optimality in natural and perturbed metabolic  
962 networks. *Proceedings of the National Academy of Sciences of the United States of America*.  
963 2002;99(23):15112-7. doi: 10.1073/pnas.232349399. PubMed PMID: 12415116; PubMed Central  
964 PMCID: PMCPMC137552.
- 965 34. Berg JM, Tymoczko JL, Stryer L. *Biochemistry*. 6 ed: W.H. Freeman; 2007.
- 966 35. Stitt M, Muller C, Matt P, Gibon Y, Carillo P, Morcuende R, et al. Steps towards an integrated  
967 view of nitrogen metabolism. *Journal of experimental botany*. 2002;53(370):959-70. Epub  
968 2002/03/26. PubMed PMID: 11912238.
- 969 36. Casey JR, Grinstein S, Orłowski J. Sensors and regulators of intracellular pH. *Nature reviews*  
970 *Molecular cell biology*. 2010;11(1):50-61. Epub 2009/12/10. doi: 10.1038/nrm2820. PubMed PMID:  
971 19997129.
- 972 37. Charnes A, Cooper WW. Programming with linear fractional functionals. *Naval Research*  
973 *Logistics Quarterly*. 1962;9:181--6.

974

975

976 **Author contributions:**

977 Conceptualization, Z.N.; Methodology, J.M.O.E.-M., Z.N.; Software, A.K.; Formal Analysis,  
978 A.K, Z.N.; Investigation, A.K., G.B.; Writing – Original Draft, G.B., Z.N.; Writing – Review  
979 and Editing, A.K., J.M.O.E.-M., G.B., and Z.N.

980

981 **Competing interests**

982 The authors declare no competing interests.

983

984 **Data availability**

985 The code and data to reproduce the results are available on GitHub  
986 <https://github.com/ankueken/SCC>.

987

988 **Supplementary Figure legends:**

989

990 **Fig. S1. Agreement between simulated and predicted bounds from a kinetic metabolic**  
991 **model of *E. coli*.** The simulated and predicted (a) lower and (b) upper concentration bounds  
992 for 23 SCC metabolites in the large-scale kinetic model of *E. coli*. The very small discrepancies  
993 are due to numerical instabilities.

994

995 **Fig. S2. Distribution of rate constants used in calculation of concentration ranges for SCC**  
996 **metabolites in a genome-scale metabolic model of *E. coli*.** Distribution of (a) the relevant  
997 rate constants and (b) their ratios for reactions coupled due to mass action kinetics; log-log  
998 distribution of (c) the relevant rate constants and (d) their ratios for reactions coupled due to  
999 mass action kinetics.

1000

1001 **Fig. S3. Effect of missing information about relevant rate constants on the accuracy of**  
1002 **concentration range predictions for a large-scale kinetic model of *E. coli*.** We consider 10  
1003 – 90% of the relevant rate constants to be unknown by random removal. We consider three  
1004 scenarios for the substitution of missing ratios of rate constants: (i) equality (i.e., kinetic rate  
1005 constants are assumed to be the same), (ii) the mean, or (iii) the median of the ratios of relevant  
1006 rate constants that are still present in the model. Shown are the boxplots (red lines inside each  
1007 box denote the corresponding medians) of the resulting Spearman correlation coefficients  
1008 between the predicted and simulated (a) lower bound vectors and (b) upper bound vectors of  
1009 concentrations over the SCC metabolites in the kinetic model of *E. coli*.

1010

1011 **Fig. S4. Effect of missing information about relevant rate constants on the accuracy of**  
1012 **concentration range predictions for a large-scale kinetic model of *E. coli*.** We consider 10

1013 – 90% of the relevant rate constants to be unknown by random removal. We consider three  
1014 scenarios for the substitution of missing ratios of rate constants: (i) equality (i.e., kinetic rate  
1015 constants are assumed to be the same), (ii) the mean, or (iii) the median of the ratios of relevant  
1016 rate constants that are still present in the model. Shown are the boxplots (red lines inside each  
1017 box denote the corresponding medians) of the average Euclidean distance between the  
1018 predicted and simulated (a) lower bound vectors and (b) upper bound vectors of concentrations  
1019 over the SCC metabolites in the kinetic model of *E. coli*.

1020

1021 **Fig. S5. Effect of missing information about relevant rate constants on the accuracy of**  
1022 **concentration range predictions for a large-scale kinetic model of *E. coli*.** We consider 10  
1023 – 90% of the relevant rate constants to be unknown by random removal. We consider three  
1024 scenarios for the substitution of missing ratios of rate constants: (i) equality (i.e., kinetic rate  
1025 constants are assumed to be the same), (ii) the mean, or (iii) the median of the ratios of relevant  
1026 rate constants that are still present in the model. Shown are the boxplots (red lines inside each  
1027 box denote the corresponding medians) of the Euclidean distance between the log-transformed  
1028 predicted and log-transformed simulated (a) lower bound vectors and (b) upper bound vectors  
1029 of concentrations over the SCC metabolites in the kinetic model of *E. coli*.

1030

1031 **Fig. S6. Effect of missing information about relevant rate constants on the accuracy of**  
1032 **concentration range predictions for a large-scale kinetic model of *E. coli*.** We consider 10  
1033 – 90% of the relevant rate constants to be unknown by random removal. We consider three  
1034 scenarios for the substitution of missing ratios of rate constants: (i) equality (i.e., kinetic rate  
1035 constants are assumed to be the same), (ii) the mean, or (iii) the median of the ratios of relevant  
1036 rate constants that are still present in the model. Shown are the boxplots (red lines inside each  
1037 box denote the corresponding medians) of the Euclidean distance between the predicted and

1038 simulated **(a)** lower bound vectors of concentrations normalized by the respective maximum  
1039 value and **(b)** upper bound vectors of concentrations normalized by the respective maximum  
1040 value over the SCC metabolites in the kinetic model of *E. coli*.

1041

1042 **Fig. S7. Predicted concentration ranges for 15 intracellular metabolites in *E. coli* at**  
1043 **growth rates (GR) of 0.4, 0.5 and  $0.7h^{-1}$  under the objective of optimizing ATP synthesis**  
1044 **and sum of total flux.** The bars denote the predicted ranges from each of the three different  
1045 scenarios **(a)** over all three replicates and **(b)** over replicates with not more than one magnitude  
1046 difference in estimated range for the ratio of  $\frac{\sigma_p}{\sigma_s}$ . The marked points denote the measured  
1047 concentrations in the employed data set.

1048

1049 **Fig. S8. Distribution of average Euclidean distance between simulated and predicted**  
1050 **concentration.** From each of the 100 simulated steady-state flux distributions we predict  
1051 concentrations for the SCC metabolites and calculate the average Euclidean distance between  
1052 the simulated and predicted concentrations.

1053

1054 **Fig. S9. Comparison of predicted ranges with measured metabolite concentrations under**  
1055 **the objective of optimizing ATP synthesis for the data set of Ishii et al.** Comparison of the  
1056 predicted concentration ranges for 15 intracellular metabolites in *E. coli* with absolute  
1057 concentrations measured at growth rates (GR) of **(a)** 0.4, **(b)** 0.5 and **(c)**  $0.7h^{-1}$ . The colored  
1058 bars denote the predicted ranges from each of the three different replicates, while the black bar  
1059 represents the prediction over all replicates. For some metabolites no value could be predicted  
1060 due to numerical instabilities. The red cross denotes the measured value at the respective GR.  
1061 For metabolites with missing red cross, there is no access to measurements. The nomenclature  
1062 of the metabolites is provided in Supplementary Table S5.



1063

1064 **Fig. S10. Comparison of predicted ranges with measured metabolite concentrations**

1065 **under the objective of optimizing ATP synthesis and total flux for the data set of Gerosa**

1066 **et al.** Comparison of the predicted concentration ranges for 10 intracellular metabolites in *E.*

1067 *coli* with absolute concentrations measured at seven different carbon sources. The red bars

1068 denote the measured ranges over three different replicates, while the black bar represents the

1069 predicted concentration. For some metabolites no value could be predicted due to numerical

1070 instabilities. For the model simulating growth on succinate no steady-state solution could be

1071 obtained without further model adaptation, therefore, no SCC concentration could be predicted.

1072

1073 **Fig. S11. Comparison of predicted ranges with measured metabolite concentrations**

1074 **under the objective of optimizing ATP synthesis for the data set of Gerosa et al.**

1075 Comparison of the predicted concentration ranges for 10 intracellular metabolites in *E. coli*

1076 with absolute concentrations measured at seven different carbon sources. The red bars denote

1077 the measured ranges over three different replicates, while the black bar represents the predicted

1078 concentration. For some metabolites no value could be predicted due to numerical instabilities.

1079 For the model simulating growth on succinate no steady-state solution could be obtained

1080 without further model adaptation, therefore, no SCC concentration could be predicted.

1081

1082 **Fig. S12. Fold change in concentration of SCC metabolites upon reaction knock-out.**

1083 Distributions of predicted and simulated fold change in concentration for the 23 SCC

1084 metabolites over 929 single knock-out mutants, for which a steady-state flux distribution could

1085 be simulated.

1086

1087

1088 **Supplementary Table captions**

1089

1090 **Table S1.** (A) Initial conditions sampled for simulations of the large-scale kinetic model of *E.*  
1091 *coli*. The initial concentration is given in units mmol/gDW. (B) Steady-state concentrations  
1092 obtained from simulations of the large-scale kinetic model of *E. coli* starting from the  
1093 respective initial conditions presented in Table S1A. The first two columns show the respective  
1094 minimum and maximum steady-state concentration over all 100 simulations. The concentration  
1095 is given in units mmol/gDW. (C) Steady-state flux distributions obtained from simulations of  
1096 the large-scale kinetic model of *E. coli* starting from the respective initial conditions presented  
1097 in Table S1A. The flux is given in units mmol/gDW/hr. (D) Simulated and predicted  
1098 concentration ranges for 23 SCC metabolites in a kinetic metabolic model of *E. coli*.

1099

1100 **Table S2.** (A) Correlation between predicted concentration range and shadow price for 23  
1101 structurally constrained metabolites to the corresponding metabolic concentrations obtained  
1102 from 100 simulations of a kinetic model of *E. coli* core metabolism. (B) Euclidean distance  
1103 between simulated and predicted concentration bounds for 23 SCC metabolites in large-scale  
1104 kinetic model of *E. coli*. In addition the table provides simulated and predicted concentration  
1105 bounds in mmol/gDW.

1106

1107 **Table S3.** List of rate constants for reactions in the genome-scale model iJO1366 of *E. coli*. In  
1108 addition to the used rate constants and the related organism in BRENDA, the table reports the  
1109 reaction abbreviation used in the model and the enzyme EC number related to each reaction.  
1110 In case more than one rate constant is known per reaction we consider the average value.

1111

1112 **Table S4.** (A) Measured concentrations of SCC metabolites in *E. coli* under different growth  
1113 scenarios. The three replicates at growth rate  $0.2\text{h}^{-1}$  are used as reference state. Measured

1114 volumetric concentrations<sup>1</sup> were converted to mmol/gDW by using a ratio of aqueous *E. coli*  
1115 cell volume to dry weight of 0.0023L/g<sup>2</sup>. **(B)** Specific flux rates for *E. coli* grown under  
1116 different scenarios.

1117

1118 **Table S5.** **(A)** Predicted concentration ranges for the 15 SCC metabolites in a genome-scale  
1119 metabolic model of *E. coli* with available data on concentration. **(B)** In addition correlation  
1120 values between predicted and simulated bounds are provided.

1121

1122 **Table S6.** Number of metabolites with structurally constrained concentrations for each of the  
1123 metabolic networks analyzed. The numbers of reactions and metabolites correspond to the  
1124 number after reaction splitting into irreversible reactions and removal of blocked reactions. The  
1125 latter is needed to satisfy the prerequisite for a positive steady state.

1126

1127 **Table S7.** Fraction of fully coupled reactions and reactions coupled due to mass action kinetics  
1128 in 14 analyzed genome-scale metabolic networks.

1129

1130 **Table S8.** Structurally constrained metabolites across the 14 analyzed metabolic networks. In  
1131 addition, the in- and out-degree for these metabolites are provided. Metabolites marked in red  
1132 correspond to energy metabolism (see Table 1 in the main text) and metabolites marked in  
1133 green exhibit absolute concentration robustness. Metabolite names and their abbreviations are  
1134 used as provided in the original models.

1135

1136 **Table S9.** Number of metabolites with structurally constrained concentrations metabolic  
1137 networks analyzed including enzyme information. The numbers of reactions and metabolites  
1138 correspond to the number after rewriting in Michaelis-Menten format, reaction splitting into

1139 irreversible reactions and removal of blocked reactions. Model components correspond to  
1140 metabolites, enzymes and enzyme-substrate-complexes.

1141

1142 **Table S10.** (A) Measured concentrations of SCC metabolites in *E. coli* under growth on  
1143 different carbon sources. Replicates for growth on acetate are used as reference state. (B)  
1144 Specific flux rates for *E. coli* under growth on different carbon sources.

1145
